# Supplementary material
Source: PubMed Central journal article supplement (PMC4056900)

# Syntheses of Siderophore-Drug Conjugates Using a Convergent Thiol-Maleimide System

Raúl E. Juárez-Hernández, Patricia A. Miller and Marvin J. Miller\*

Department of Chemistry and Biochemistry, 251 Nieuwland Science Hall, University of Notre Dame, Notre Dame, IN 46556, USA

Supporting Information

## TABLE OF CONTENTS

---

|                                                                                                                |         |
|----------------------------------------------------------------------------------------------------------------|---------|
| Experimental Procedures of Chemistry and Microbiology.....                                                     | S2-S6   |
| Table S1. Antibacterial activity of compounds in the agar diffusion assay.....                                 | S6      |
| Table S2. MIC ( $\mu\text{M}$ ) of compounds determined in MHII media + 100 $\mu\text{M}$ 2,2'-bipyridine..... | S6      |
| References.....                                                                                                | S7      |
| $^1\text{H}$ , $^{13}\text{C}$ NMR spectrum of <b>4</b> .....                                                  | S8-S9   |
| $^1\text{H}$ , $^{13}\text{C}$ NMR spectrum of <b>5</b> .....                                                  | S10-S11 |
| $^1\text{H}$ , $^{13}\text{C}$ NMR spectrum of <b>6</b> .....                                                  | S12-S13 |
| $^1\text{H}$ , $^{13}\text{C}$ NMR spectrum of <b>7</b> .....                                                  | S14-S15 |
| $^1\text{H}$ , $^{13}\text{C}$ NMR spectrum of <b>8</b> .....                                                  | S16-S17 |
| $^1\text{H}$ , $^{13}\text{C}$ NMR spectrum of <b>9</b> .....                                                  | S18-S19 |
| $^1\text{H}$ , $^{13}\text{C}$ NMR spectrum of <b>10</b> .....                                                 | S20-S21 |
| $^1\text{H}$ , $^{13}\text{C}$ NMR spectrum of <b>11</b> .....                                                 | S22-S23 |
| $^1\text{H}$ NMR spectrum of <b>12</b> .....                                                                   | S24     |
| $^1\text{H}$ NMR spectrum of <b>17</b> .....                                                                   | S25     |
| $^1\text{H}$ NMR spectrum of <b>16</b> .....                                                                   | S26     |
| $^1\text{H}$ NMR spectrum of <b>18</b> .....                                                                   | S27     |
| LCMS data of <b>12</b> .....                                                                                   | S28-S29 |
| LCMS data of <b>16</b> .....                                                                                   | S30-S31 |
| LCMS data of <b>17</b> .....                                                                                   | S32-S33 |
| LCMS data of <b>18</b> .....                                                                                   | S34-S35 |

---

\*To whom correspondence should be addressed M.J.M.: phone, (574) 631-7571; fax (574) 631-6652; email, mmiller1@nd.edu

## EXPERIMENTAL

**Chemistry: General materials and methods.** All solvents and reagents were obtained from commercial sources and used without further purification unless otherwise stated. Dichloromethane ( $\text{CH}_2\text{Cl}_2$ ) and acetonitrile ( $\text{CH}_3\text{CN}$ ) were distilled from  $\text{CaH}_2$ . Tetrahydrofuran (THF) was distilled from a mixture of sodium metal and benzophenone ketyl. Diisopropylethylamine (DIPEA), was used from Acros Seal® anhydrous bottle.  $^1\text{H-NMR}$  and  $^{13}\text{C-NMR}$  spectra were obtained on a 500 MHz, or 600 MHz Varian DirectDrive spectrometer and FIDs were processed using ACD/SpecManager version 11. Chemical shifts ( $\delta$ ) are given in parts per million (ppm) and are referenced to residual solvent peaks as internal standards. Coupling constants ( $J$ ) are reported in hertz (Hz). High resolution, accurate mass measurements were obtained with a Bruker micrOTOF II electrospray ionization time-of-flight mass spectrometer in positive ion mode. LCMS was performed on a Waters ZQ instrument consisting of a chromatography module Alliance HT, photodiode array detector 2996, and mass spectrometer Micromass ZQ with an MS electrospray source operate at capillary voltage 3.5 kV and a desolvation temperature of 300 °C. The LCMS instrument used a YMC Pro C18 reverse phase column (3.0 x 50 mm) fit with precolumn frit (0.5  $\mu\text{m}$ ) and YMC Pro C18 guard column (2.0 x 10 mm) for all analyses. Mobile phases used were 10 mM ammonium acetate in HPLC grade water (A) and HPLC grade acetonitrile (B). A gradient was formed from 5%-80% of B in 10 min, hold 80% of B for 2 min, then 80%-5% of B in 0.5 min at a flow rate of 0.7 mL/min (total run time of 12.5 min). Semi-preparative HPLC purifications were performed on a Waters semi-preparative binary pump system at a flow rate of 15 mL/min with detection by UV detection at 254 nm with separation facilitated by a YMC-Pack Pro C18 column, 150 x 20 mm (I.D.), particle size 5  $\mu\text{m}$  fit with a guard column. All reactions were conducted under argon gas unless otherwise noted. Solvents were removed *in vacuo* on a rotary evaporator. All reactions were carried out at ambient temperature (~22 °C) unless stated otherwise. Reactions were monitored by thin layer chromatography (TLC) performed with aluminum-backed Merck 60-F<sub>254</sub> silica gel plates using a 254 nm lamp, ceric ammonium molybdate (CAM) stain or  $\text{FeCl}_3$  stain for visualization. Silica gel column chromatography was performed using Sorbent Technologies silica gel 60 (32-63  $\mu\text{m}$ ). Melting points were determined in capillary tubes using a Thomas Hoover melting point apparatus and are uncorrected.

**S-Triptyl protected acid 4.**<sup>23-24</sup> To a solution of 5.95 g (30.5 mmol) of commercially available 6-bromohexanoic acid and 8.56 g (30.9 mmol) of triphenyl methanethiol in 60 mL of freshly distilled  $\text{CH}_2\text{Cl}_2$  under argon, 7 mL (46.9 mmol) of DBU (1,8-diazabicycloundec-7-ene) were added dropwise. After 3 h, the crude mixture was poured over a mixture of ice/1 M  $\text{H}_2\text{SO}_4$  (60 mL), and the aqueous layer was further extracted with EtOAc (2 x 20 mL), the organic volumes were combined and sequentially washed with brine/ice (2 x 60 mL), and brine (60 mL); the EtOAc layer was separated, dried over  $\text{Na}_2\text{SO}_4$ , filtered, concentrated under vacuum, purified by silica gel chromatography using  $\text{CH}_2\text{Cl}_2$  as the eluent TLC  $R_f$  = 0.61 (2:8, EtOAc/ $\text{CH}_2\text{Cl}_2$ , CAM stain), and recrystallized from  $\text{CH}_2\text{Cl}_2$ /hexanes to afford 4.84 g (40%) of **7**<sup>23-24</sup> as white crystals: mp 91-92 °C (lit. 90-91 °C)<sup>23</sup>;  $^1\text{H NMR}$  (600 MHz,  $\text{CDCl}_3$ )  $\delta$  7.44 - 7.40 (m, 6H), 7.31 - 7.26 (m, 6H), 7.24 - 7.19 (m, 3H), 2.27 (t,  $J$  = 7.5 Hz, 2H), 2.15 (t,  $J$  = 7.3 Hz, 2H), 1.51 (dt,  $J$  = 15.3, 7.4 Hz, 2H), 1.43 - 1.36 (m, 2H), 1.33 - 1.26 (m, 2H);  $^{13}\text{C NMR}$  (150 MHz,  $\text{CDCl}_3$ )  $\delta$  179.5, 145.2, 129.8, 128.0, 126.8, 66.7, 33.9, 31.9, 28.6, 28.5, 24.4; HRMS (ESI)  $m/z$  [ $\text{M}+\text{Na}$ ]<sup>+</sup>: calcd for  $\text{C}_{25}\text{H}_{26}\text{NaO}_2\text{S}^+$ , 413.1546; found, 413.1535.

**S-Triptyl protected NHS ester 5.** To a solution of 2.40 g (6.15 mmol) of S-triptyl protected acid **4**, and 2.24 g (19.5 mmol) of *N*-hydroxysuccinimide in 40 mL of freshly distilled  $\text{CH}_2\text{Cl}_2$  under argon, 3.13 g (16.3 mmol) of EDC•HCl were added in one portion. After 16 h, the crude mixture was poured over 0.001 M HCl (pH = 3, 70 mL), the layers were separated and the organic volume was sequentially washed with 0.001 M HCl (50 mL), brine (50 mL), 10%  $\text{NaHCO}_3$  (50 mL), and brine (2 x 50 mL); the EtOAc layer was separated, dried over  $\text{Na}_2\text{SO}_4$ , filtered, and concentrated under vacuum to afford 3.25 g of **5** as a colorless, viscous oil in quantitative yield. The desired product could be purified by silica gel chromatography using  $\text{CH}_2\text{Cl}_2$  as the eluent if necessary, TLC  $R_f$  = 0.76 (1:9, EtOAc/ $\text{CH}_2\text{Cl}_2$ , CAM stain):  $^1\text{H NMR}$  (600 MHz,  $\text{CDCl}_3$ )  $\delta$  7.45 - 7.40 (m, 6H), 7.31 - 7.27 (m, 6H), 7.24 - 7.20 (m, 3H), 2.83 (d,  $J$  = 7.3 Hz, 4H), 2.52 (t,  $J$  = 7.5 Hz, 2H), 2.17 (t,  $J$  = 7.2 Hz, 2H), 1.64 - 1.56 (m, 2H), 1.43 - 1.32 (m, 4H);  $^{13}\text{C NMR}$  (150 MHz,  $\text{CDCl}_3$ )  $\delta$  169.3, 168.6, 145.1, 129.8, 128.0, 126.8, 66.7, 31.7, 30.9, 28.3, 28.3, 25.8, 24.2; HRMS (ESI)  $m/z$  [ $\text{M}+\text{Na}$ ]<sup>+</sup>: calcd for  $\text{C}_{29}\text{H}_{29}\text{NNaO}_4\text{S}^+$ , 510.1710; found, 510.1693.

**S-Triptyl protected ampicillin 6.** A mixture of 0.105 g (0.26 mmol) of ampicillin trihydrate in 2 mL of THF/ $\text{H}_2\text{O}$  (4:1) and 0.09 mL of  $\text{Et}_3\text{N}$  (0.64 mmol) was added slowly to a solution of 0.116 g (0.24 mmol) of S-triptyl protected NHS ester **5** in 3 mL of THF. After 7 h, the crude mixture was diluted with EtOAc (40 mL) and poured over ice/1 M  $\text{H}_2\text{SO}_4$  (40 mL), the aqueous layer was further extracted with EtOAc (2 x 15 mL), the organics were combined and washed with ice/1 M  $\text{H}_2\text{SO}_4$  (30 mL), and brine (2 x 30 mL). The EtOAc layer was separated, dried over  $\text{Na}_2\text{SO}_4$ , filtered, concentrated under vacuum, purified by silica gel chromatography using a gradient of 1:99 to 4:96, isopropyl alcohol/ $\text{CH}_2\text{Cl}_2$ , TLC  $R_f$  = 0.36 (2:8, isopropyl alcohol/ $\text{CH}_2\text{Cl}_2$ , CAM stain),

and triturated with diethyl ether to afford 0.052 g (30%) of **6** as a white, powdery solid: mp 120-122 °C (sinters and decomp.); <sup>1</sup>H NMR (600 MHz, CD<sub>3</sub>OD) δ 7.43 - 7.36 (m, 8H), 7.34 - 7.25 (m, 9H), 7.22 - 7.18 (m, 3H), 5.57 (s, 1H), 5.52 - 5.49 (m, 1H), 5.43 (d, *J* = 4.1 Hz, 1H), 4.31 (s, 1H), 2.20 (td, *J* = 7.5, 0.9 Hz, 2H), 2.12 (t, *J* = 7.3 Hz, 2H), 1.55 (s, 3H), 1.49 - 1.43 (m, 5H), 1.37 - 1.31 (m, 2H), 1.27 - 1.20 (m, 2H); <sup>13</sup>C NMR (150 MHz, CD<sub>3</sub>OD) δ 175.8, 174.6, 172.5, 171.2, 146.6, 138.6, 130.9, 129.9, 129.4, 129.0, 127.8, 72.1, 68.9, 65.3, 60.1, 58.3, 36.5, 33.0, 31.3, 29.7, 29.6, 27.5, 26.6; HRMS (ESI) *m/z* [M+Na]<sup>+</sup>: calcd for C<sub>36</sub>H<sub>43</sub>N<sub>5</sub>NaO<sub>7</sub>S<sub>2</sub><sup>+</sup>, 744.2496; found, 744.2516.

**S-Trityl protected loracarbef 7.** A suspension of 0.25 g (0.72 mmol) of loracarbef in 3 mL of DMF, 2 mL of pyridine and 1 mL of H<sub>2</sub>O, was added to a solution of 0.23 g (0.47 mmol) of *S*-trityl protected NHS ester **5** in 2 mL of DMF, to improve solubility, 2 mL of a solution THF/H<sub>2</sub>O (4:1) was added to the reaction mixture. After 3 h, 0.11 mL (0.78 mmol) of Et<sub>3</sub>N were added and after 3 h the solvent was removed *in vacuo* to afford a yellow solid that was dissolved in EtOAc (50 mL), the solution was sequentially washed with 0.001 M HCl (pH = 3) until the pH of the aqueous layer was approximately 2.5-3 (by paper). The layers were separated, and the aqueous volume was extracted with EtOAc (2 × 30 mL), the organics were combined, washed with H<sub>2</sub>O (pH = 3, 50 mL), brine (2 × 70 mL), the layers were then separated, dried over Na<sub>2</sub>SO<sub>4</sub>, concentrated and purified by silica gel chromatography using a gradient of 2:98 to 4:96 isopropyl alcohol/CH<sub>2</sub>Cl<sub>2</sub> as the eluent, TLC R<sub>f</sub> = 0.25 (plate developed twice, 2:8, isopropyl alcohol/CH<sub>2</sub>Cl<sub>2</sub>, CAM stain), to afford 0.19 g (56%) of **7** as an off-white, solidified foam: mp 118-120 °C (sinters); <sup>1</sup>H NMR (600 MHz, CDCl<sub>3</sub>) δ 7.55 (br. s., 1H), 7.42 - 7.34 (m, 8H), 7.30 - 7.23 (m, 9H), 7.22 - 7.17 (m, 3H), 7.07 (br. s., 1H), 5.65 (d, *J* = 7.6 Hz, 1H), 5.24 (t, *J* = 5.0 Hz, 1H), 3.89 - 3.80 (m, 1H), 2.57 - 2.40 (m, 2H), 2.19 - 2.06 (m, 4H), 1.60 - 1.52 (m, 1H), 1.42 (quin, *J* = 7.6 Hz, 2H), 1.38 - 1.25 (m, 3H), 1.23 - 1.17 (m, 2H); <sup>13</sup>C NMR (150 MHz, CDCl<sub>3</sub>) δ 173.6, 171.2, 164.6, 145.2, 137.9, 129.8, 129.2, 128.7, 128.0, 127.3, 126.7, 66.6, 58.9, 56.5, 53.1, 36.5, 31.9, 31.6, 28.6, 28.5, 25.1, 21.1; HRMS (ESI) *m/z* [M+Na]<sup>+</sup>: calcd for C<sub>41</sub>H<sub>40</sub>ClN<sub>3</sub>NaO<sub>5</sub>S<sup>+</sup>, 744.2269; found, 744.2254.

**S-Trityl protected ciprofloxacin 8.** A mixture of 0.67 g (2.01 mmol) of ciprofloxacin in 12 mL of DMF/H<sub>2</sub>O (1:1) and 0.6 mL of Et<sub>3</sub>N (4.27 mmol) was added slowly to a solution of 0.49 g (1.01 mmol) of *S*-trityl protected NHS ester **5** in 12 mL of THF. After 4 h, the crude mixture was diluted with EtOAc (70 mL) and poured over 0.001 M HCl (pH = 3, 70 mL), then added 1M HCl until pH = 2 (by paper); the aqueous layer was further extracted with EtOAc (40 mL), the organics were combined and washed with 0.001 M HCl (3 × 70 mL), and brine (2 × 70 mL). The EtOAc layer was separated, dried over Na<sub>2</sub>SO<sub>4</sub>, filtered, concentrated under vacuum, purified by silica gel chromatography using a gradient of 2:98 to 3:97, isopropyl alcohol/CH<sub>2</sub>Cl<sub>2</sub> as the eluent, TLC R<sub>f</sub> = 0.32 (5:95, isopropyl alcohol/CH<sub>2</sub>Cl<sub>2</sub>, CAM stain), and recrystallized from CH<sub>2</sub>Cl<sub>2</sub>/hexanes to afford 0.36 g (51%) of **8** as a light-yellow colored powder: mp 165-166 °C; <sup>1</sup>H NMR (500 MHz, CDCl<sub>3</sub>) δ 8.70 (s, 1H), 7.96 (d, *J* = 12.8 Hz, 1H), 7.44 - 7.37 (m, 6H), 7.34 (d, *J* = 7.0 Hz, 1H), 7.30 - 7.24 (m, 6H), 7.22 - 7.18 (m, 3H), 3.89 - 3.82 (m, 2H), 3.72 - 3.65 (m, 2H), 3.56 - 3.49 (m, 1H), 3.38 - 3.25 (m, 4H), 2.34 - 2.28 (m, 2H), 2.17 (t, *J* = 7.3 Hz, 2H), 1.56 (quin, *J* = 7.6 Hz, 2H), 1.48 - 1.29 (m, 6H), 1.23 - 1.17 (m, 2H); <sup>13</sup>C NMR (125 MHz, CDCl<sub>3</sub>) δ 177.1, 177.1, 171.7, 166.9, 154.7, 152.7, 147.7, 145.6, 145.5, 145.1, 139.1, 129.7, 128.0, 126.7, 120.3, 120.2, 112.7, 112.5, 108.2, 105.3, 105.3, 66.6, 50.4, 50.3, 49.6, 49.6, 45.5, 41.3, 35.5, 33.1, 32.0, 29.0, 28.6, 25.0; HRMS (ESI) *m/z* [M+H]<sup>+</sup>: calcd for C<sub>42</sub>H<sub>43</sub>FN<sub>3</sub>O<sub>4</sub>S<sup>+</sup>, 704.2953; found, 704.2959.

**S-Trityl protected nadifloxacin 9.** To a solution of 98.8 mg (0.25 mmol) of *S*-trityl protected hexanoic acid **4**, and 81.4 mg (0.23 mmol) of commercially available nadifloxacin in 5 mL of anhydrous CH<sub>2</sub>Cl<sub>2</sub>, was added 0.12 g (0.62 mmol) of EDC•HCl and 0.04 g (0.03 mmol) of DMAP. After 13 h, the reaction mixture was diluted with CH<sub>2</sub>Cl<sub>2</sub> (20 mL), and washed with H<sub>2</sub>O (pH = 3, 25 mL), the aqueous layer was extracted with CH<sub>2</sub>Cl<sub>2</sub> (25 mL) and the combined organics were washed with H<sub>2</sub>O (pH = 3, 30 mL), brine (2 × 30 mL), dried over Na<sub>2</sub>SO<sub>4</sub>, concentrated *in vacuo*, and purified by silica gel chromatography using a gradient of 1:99 to 3:97 isopropyl alcohol/CH<sub>2</sub>Cl<sub>2</sub> as the eluent, TLC R<sub>f</sub> = 0.75 (2:8, isopropyl alcohol/CH<sub>2</sub>Cl<sub>2</sub>, CAM stain), to afford 39.6 mg (24%) of **9** as an off-white residue: <sup>1</sup>H NMR (600 MHz, CDCl<sub>3</sub>) δ 8.70 (s, 1H), 8.03 (d, *J* = 12.3 Hz, 1H), 7.44 - 7.39 (m, 6H), 7.31 - 7.25 (m, 6H), 7.23 - 7.18 (m, 3H), 5.00 (br. s., 1H), 4.54 (qt, *J* = 6.7, 3.4 Hz, 1H), 3.37 - 3.00 (m, 4H), 2.87 (ddd, *J* = 17.8, 11.2, 6.9, 1H), 2.28 (t, *J* = 7.5 Hz, 2H), 2.23 - 2.13 (m, 3H), 2.13 - 1.95 (m, 2H), 1.93 - 1.72 (m, 2H), 1.68 - 1.59 (m, 1H), 1.59 - 1.49 (m, 5H), 1.48 - 1.37 (m, 2H), 1.36 - 1.20 (m, 4H); <sup>13</sup>C NMR (150 MHz, CDCl<sub>3</sub>) δ 177.7, 177.7, 173.1, 167.5, 146.6, 145.2, 133.8, 133.8, 129.8, 128.0, 126.8, 111.1, 110.9, 108.0, 66.6, 58.1, 34.6, 32.0, 29.9, 28.6, 28.5, 26.2, 24.8, 20.4, 19.0; HRMS (ESI) *m/z* [M+H]<sup>+</sup>: calcd for C<sub>44</sub>H<sub>46</sub>FN<sub>2</sub>O<sub>5</sub>S<sup>+</sup>, 733.3106; found, 733.3128.

**N-Maleimide NHS ester 10.** To a solution of 0.043 g (0.22 mmol) of 5-maleimidopentanoic acid<sup>33</sup> and 0.076 g (0.66 mmol) of *N*-hydroxysuccinimide in 5 mL of anhydrous CH<sub>2</sub>Cl<sub>2</sub>, were added 0.202 g of EDC•HCl (1.05 mmol) in one portion, the reaction mixture stirred under argon for 3 h before it was judged complete by TLC R<sub>f</sub> = 0.25 (5:95, isopropyl alcohol/CH<sub>2</sub>Cl<sub>2</sub>, CAM stain). The organic solution was sequentially washed with 10% citric acid (10 mL), brine (10 mL), 10% NaHCO<sub>3</sub> (10 mL), and brine (10 mL), then dried over Na<sub>2</sub>SO<sub>4</sub>, filtered,

concentrated under vacuum and purified by silica gel chromatography using 3:97, isopropyl alcohol/CH<sub>2</sub>Cl<sub>2</sub> as the eluent to afford 0.058 g (90%) of **10** as an off-white solid: mp 135-137 °C; <sup>1</sup>H NMR (600 MHz, CDCl<sub>3</sub>) δ 6.69 (s, 2H), 3.59 - 3.53 (m, 2H), 2.83 (d, *J* = 4.1 Hz, 4H), 2.68 - 2.62 (m, 2H), 1.77 - 1.67 (m, 4H); <sup>13</sup>C NMR (150 MHz, CDCl<sub>3</sub>) δ 170.9, 169.3, 168.3, 134.3, 37.2, 30.5, 27.7, 25.8, 21.9; HRMS (ESI) *m/z* [M+Na]<sup>+</sup>: calcd for C<sub>13</sub>H<sub>14</sub>N<sub>2</sub>NaO<sub>6</sub><sup>+</sup>, 317.0744; found, 317.0741.

**N-Maleimide containing DfoB 11.** To remove traces of iron, all the glassware involved was washed with 6 M HCl, rinsed thoroughly with deionized H<sub>2</sub>O, until pH > 6 (pH paper), washed with acetone and oven-dried. To a solution of 63.1 mg (0.10 mmol) of commercially available DfoB mesylate salt in 2 mL of phosphate buffer (pH = 8)<sup>21</sup>, were added 57.6 mg (0.20 mmol) of *N*-maleimide containing NHS ester **10** in 2 mL of THF, and the solution was allowed to stir for 47 h before the solvent was removed under vacuum, reverse phase TLC R<sub>f</sub> = 0.36 (1:2, CH<sub>3</sub>CN/H<sub>2</sub>O, FeCl<sub>3</sub> stain). The crude material was suspended in H<sub>2</sub>O (20 mL), cooled down to 0 °C, and filtered, the obtained precipitate was sequentially washed with cold H<sub>2</sub>O (50 mL), cold sat. NaHCO<sub>3</sub> (50 mL), cold H<sub>2</sub>O (50 mL), cold acetone (20 mL), and cold CH<sub>2</sub>Cl<sub>2</sub> (50 mL), to afford 35.4 mg (50%) of **11** as an off-white solid: mp 163-166 °C (decomp.); <sup>1</sup>H NMR (600 MHz, DMSO-*d*<sub>6</sub>) δ 9.67 (br. s., 2H), 7.84 - 7.68 (m, 3H), 7.00 (s, 2H), 3.56 (br. s., 1H), 3.49 - 3.39 (m, 5H), 3.37 (t, *J* = 6.6 Hz, 2H), 3.04 - 2.92 (m, 6H), 2.62 - 2.52 (m, 4H), 2.32 - 2.22 (m, 4H), 2.04 (t, *J* = 6.9 Hz, 2H), 1.96 (s, 3H), 1.61 - 1.30 (m, 16H), 1.27 - 1.14 (m, 6H); <sup>13</sup>C NMR (150 MHz, DMSO-*d*<sub>6</sub>) δ 171.9, 171.5, 171.3, 171.3, 171.1, 170.1, 134.5, 47.1, 46.8, 38.4, 38.3, 36.9, 36.6, 34.8, 29.9, 28.8, 27.6, 27.3, 26.0, 25.2, 23.5, 22.5, 20.4; HRMS (ESI) *m/z* [M+H]<sup>+</sup>: calcd for C<sub>34</sub>H<sub>58</sub>N<sub>7</sub>O<sub>11</sub><sup>+</sup>, 740.4189; found, 740.4214.

**N-Maleimide containing Ga-DfoB 12.** To a suspension of 0.051 g (0.069 mmol) of maleimide-containing DfoB **11** in 18 mL of anhydrous methanol under argon, 0.028 g (0.077 mmol) of Ga(acac)<sub>3</sub> were added in one portion. The mixture was stirred at 40 °C for 6 h, and at room temperature for 16 h, before the volatiles were removed by evaporation. The resulting crude was purified by iron-free<sup>32</sup> silica gel chromatography using 9:91, methanol/CH<sub>2</sub>Cl<sub>2</sub> as the eluent, TLC R<sub>f</sub> = 0.15 (plate developed twice using 1:9, methanol/CH<sub>2</sub>Cl<sub>2</sub>, CAM stain), and precipitated from chloroform/diethyl ether to afford 0.047 g (84%) of **12** as a white solid: <sup>1</sup>H NMR (600 MHz, CDCl<sub>3</sub>) δ 6.69 (s, 2H), 3.94 - 3.62 (m, 8H), 3.53 (t, *J* = 6.6 Hz, 4H), 3.39 - 3.27 (m, 2H), 3.21 - 2.75 (m, 8H), 2.52 (br. s., 3H), 2.36 (br. s., 3H), 2.30 - 2.19 (m, 3H), 2.16 (s, 3H), 2.06 (br. s., 2H), 1.86 - 1.15 (m, 25H); HRMS (ESI) *m/z* [M+H]<sup>+</sup>: calcd for C<sub>34</sub>H<sub>55</sub>GaN<sub>7</sub>O<sub>11</sub><sup>+</sup>, 806.3210; found, 806.3206; HPLC-LCMS retention time 3.65 min.

**Ga-DfoB-loracarbef conjugate 16.** *Sulfur deprotection:* To a solution of 28.9 mg (0.04 mmol) of *S*-trityl protected loracarbef **7** in 4.8 mL of freshly distilled and degassed CH<sub>2</sub>Cl<sub>2</sub> (argon bubbled for 30 minutes), were added 0.12 mL (2% v/v) of triisopropylsilane (*i*Pr<sub>3</sub>SiH) and 1 mL (20% v/v) of TFA, the solution was stirred under argon for 5 min before being concentrated under vacuum, and co-evaporated with CH<sub>2</sub>Cl<sub>2</sub> (2 × 2 mL) to afford thiol-containing loracarbef **13** as a white solid that was used without further characterization. *Siderophore conjugation:* To a suspension of 0.04 mmol of **13** and 13.2 mg (0.016 mmol) of Ga-DfoB **12** in 2 mL of anhydrous and degassed THF, were added 1 mL of CH<sub>3</sub>CN and 9 μL (0.052 mmol) of anhydrous DIPEA and the mixture was stirred under argon for 70 h, until judged complete by complete consumption of **12** under LCMS conditions. The crude mixture was concentrated under vacuum, the resulting solid was triturated with hexanes, and precipitated from CHCl<sub>3</sub>/ether: the material was dissolved in 0.5 mL of CHCl<sub>3</sub> and slowly added to cold ether (0 °C, 19 mL), after removal of the mother liquor, an off-white solid was obtained and purified by preparative HPLC. *Purification:* The crude material was dissolved in 0.7 mL of DMSO and purified in 7 injections (7 × 0.1 mL) using 10 mM ammonium acetate in HPLC grade water (A) and HPLC grade acetonitrile (B) as the eluent, using a gradient of 5-80% B in 7 min, then increase to 90% of B for 2 min, hold 90% of B for 2 min, then decrease to 5% B in 1 min (total run time = 12 min). Pure fractions of **16** (HPLC-LCMS retention time 4.55 min) were combined and concentrated under vacuum to afford 11.8 mg (56%) of a light tan residue: <sup>1</sup>H NMR (600 MHz, CDCl<sub>3</sub>) δ 7.66 - 7.41 (m, 2H), 7.39 - 7.23 (m, 3H), 3.94 - 3.58 (m, 6H), 3.49 (br. s., 3H), 3.38 - 2.67 (m, 8H), 2.57 - 2.18 (m, 7H), 2.14 (br. s., 2H), 2.07 (s, 3H), 1.78 - 1.13 (m, 19H); HRMS (ESI) *m/z* [M+H]<sup>+</sup>: calcd for C<sub>56</sub>H<sub>81</sub>ClGa<sub>10</sub>O<sub>16</sub>S<sup>+</sup>, 1285.4492; found, 1285.4536.

**Ga-DfoB-ciprofloxacin conjugate 17.** *Sulfur deprotection:* To a solution of 30.4 mg (0.04 mmol) of *S*-trityl protected ciprofloxacin **8** in 4.8 mL of freshly distilled and degassed CH<sub>2</sub>Cl<sub>2</sub> (argon bubbled for 30 minutes), were added 0.12 mL (2% v/v) of triisopropylsilane (*i*Pr<sub>3</sub>SiH) and 1 mL (20% v/v) of TFA, the solution was stirred under argon for 5 min before being concentrated under vacuum, and co-evaporated with CH<sub>2</sub>Cl<sub>2</sub> (2 × 2 mL) to afford thiol-containing ciprofloxacin **14** as a white solid that was used without further characterization. *Siderophore conjugation:* To a suspension of 0.04 mmol of **14** and 12.3 mg (0.015 mmol) of Ga-DfoB **12** in 2 mL of anhydrous and degassed THF, were added 1 mL of CH<sub>3</sub>CN and 9 μL (0.052 mmol) of anhydrous DIPEA and the mixture was stirred under argon for 69 h, until judged complete by complete consumption of **14** under LCMS conditions. The crude mixture was concentrated under vacuum, the resulting solid was triturated with

hexanes, and precipitated from CHCl<sub>3</sub>/ether: the material was dissolved in 0.5 mL of CHCl<sub>3</sub> and slowly added to cold ether (0 °C, 19 mL), after removal of the mother liquor, an off-white solid was obtained and purified by preparative HPLC. *Purification*: The crude material was dissolved in 0.7 mL of DMSO and purified in 7 injections (7 × 0.1 mL) using 10 mM ammonium acetate in HPLC grade water (A) and HPLC grade acetonitrile (B) as the eluent, using a gradient of 5-80% B in 7 min, then increase to 90% of B for 2 min, hold 90% of B for 2 min, then decrease to 5% B in 1 min (total run time = 12 min). Pure fractions of **17** (HPLC-LCMS retention time 5.85 min) were combined and concentrated under vacuum to afford 4.6 mg (24%) of a light yellow residue: <sup>1</sup>H NMR (600 MHz, CDCl<sub>3</sub>) δ 8.81 (s, 1H), 8.08 (d, *J* = 12.6 Hz, 1H), 7.39 (d, *J* = 7.0 Hz, 1H), 3.92 - 3.83 (m, 2H), 3.77 - 3.61 (m, 8H), 3.59 - 3.44 (m, 5H), 3.39 - 3.26 (m, 5H), 3.19 - 3.10 (m, 2H), 3.08 - 2.73 (m, 8H), 2.54 - 2.46 (m, 3H), 2.45 - 2.31 (m, 5H), 2.26 - 2.18 (m, 3H), 2.16 (s, 3H), 2.09 (br. s., 2H), 1.77 - 1.14 (m, 38H); HRMS (ESI) *m/z* [M+H]<sup>+</sup>: calcd for C<sub>57</sub>H<sub>83</sub>FGaN<sub>10</sub>O<sub>15</sub>S<sup>+</sup>, 1267.4994; found, 1267.5016.

**Ga-DfoB-nadifloxacin conjugate 18.** *Sulfur deprotection*: To a solution of 31.8 mg (0.04 mmol) of *S*-trityl protected nadifloxacin **9** in 4.8 mL of freshly distilled and degassed CH<sub>2</sub>Cl<sub>2</sub> (argon bubbled for 30 minutes), were added 0.12 mL (2% v/v) of triisopropylsilane (*t*Pr<sub>3</sub>SiH) and 1 mL (20% v/v) of TFA, the solution was stirred under argon for 5 min before being concentrated under vacuum, and co-evaporated with CH<sub>2</sub>Cl<sub>2</sub> (2 × 2 mL) to afford thiol-containing nadifloxacin **15** as a tan residue that was used without further characterization. *Siderophore conjugation*: To a suspension of 0.04 mmol of **15** and 18.5 mg (0.023 mmol) of Ga-DfoB **12** in 3 mL of anhydrous and degassed THF, were added and 10 μL (0.057 mmol) of anhydrous DIPEA and the mixture was stirred under argon for 89 h. The crude mixture was concentrated under vacuum, co-evaporated with CHCl<sub>3</sub> (3 × 4 mL), triturated with hexanes, and precipitated from CHCl<sub>3</sub>/ether: the material was dissolved in 0.5 mL of CHCl<sub>3</sub> and slowly added to cold ether (0 °C, 19 mL), after removal of the mother liquor, an off-white solid was obtained and purified by preparative HPLC. *Purification*: The crude material was dissolved in 0.7 mL of DMSO and purified in 7 injections (7 × 0.1 mL) using 10 mM ammonium acetate in HPLC grade water (A) and HPLC grade acetonitrile (B) as the eluent, using a gradient of 5-90% B in 7 min, then hold 90% of B for 7 min, then decrease to 5% B in 1 min (total run time = 15 min). Pure fractions of **18** (HPLC-LCMS retention time 5.07 min: 5-90% B in 7 min, hold 90% B for 5 min, 90-5% B in 0.5 min. Total run time of 12.5 min) were combined and concentrated under vacuum to afford 6.2 mg (21%) of a yellow residue: <sup>1</sup>H NMR (600 MHz, CDCl<sub>3</sub>) δ 8.71 (s, 1H), 8.04 (d, *J* = 12.3 Hz, 1H), 4.60 - 4.51 (m, 1H), 3.72 (d, *J* = 3.8 Hz, 4H), 3.60 - 3.46 (m, 3H), 3.38 - 3.27 (m, 2H), 3.20 - 3.10 (m, 2H), 2.95 - 2.73 (m, 5H), 2.56 - 2.45 (m, 2H), 2.37 (br. s., 3H), 2.29 - 1.16 (m, 39H); HRMS (ESI) *m/z* [M+H]<sup>+</sup>: calcd for C<sub>59</sub>H<sub>86</sub>FGaN<sub>9</sub>O<sub>16</sub>S<sup>+</sup>, 1296.5148; found, 1296.5151.

**Microbiology: Antibiotic Susceptibility Testing by the Agar Diffusion Method: General Materials and Methods.** All liquids and media were sterilized by autoclaving (121 °C, 15 min) before use. All aqueous solutions and media were prepared using distilled, deionized, and filtered water (Millipore Milli-Q Advantage A10 Water Purification System). Luria broth (LB) was purchased from VWR. Mueller-Hinton no. 2 broth (MHII broth; cation adjusted) was purchased from Sigma-Aldrich (St. Louis, MO). Mueller-Hinton no. 2 agar (MHII agar; HiMedia Laboratories) was purchased from VWR. McFarland BaSO<sub>4</sub> turbidity standards were purchased from bioMérieux, Inc. Sterile plastic Petri dishes (145 mm × 20 mm; Greiner Bio-One) were purchased from VWR. Ciprofloxacin was purchased from Sigma-Aldrich (St. Louis, MO).

Antibacterial activity of the compounds was determined by a modified Kirby-Bauer agar diffusion assay.<sup>27</sup> Overnight cultures of test organisms were grown in LB broth for 18-24 h and standard suspensions of 1.5 × 10<sup>6</sup> CFU/mL were prepared in saline solution (0.9% NaCl) according to a 0.5 BaSO<sub>4</sub> McFarland Standard.<sup>28</sup> Each standardized suspension (0.1 mL) was added to 34 mL of sterile, melted MHII agar tempered to 47-50 °C. After gentle mixing, the inoculated agar media was poured into a sterile plastic Petri dish (145 mm × 20 mm) and allowed to solidify near a flame with the lid cracked for ≈ 30 min. Wells of 9.0 mm diameter were cut from the Petri dish agar and filled with exactly 50 μL of the test sample solution. The Petri dish was incubated at 37 °C for 18-24 h, and the inhibition zone diameters were measured (mm) with an electronic caliper after 24-48 h.

**Determination of MIC Values by the Broth Microdilution Assay:** Antibacterial activity of the synthesized compounds was determined by measuring their minimum inhibitory concentrations (MICs) using the broth microdilution method according to the Clinical and Laboratory Standards Institute (CLSI, formerly the NCCLS) guidelines.<sup>29</sup> Each well of a 96-well microtiter plate was filled with 50 μL of sterile broth media (MHII or MHII + 100 μM of 2,2'-bipyridine). Each test compound was dissolved in DMSO making a 20 mM solution, then diluted with sterile broth media to the screened initial concentration (100-200 μM). In certain cases, the experiment was repeated at a different initial concentration to accurately determine the MIC values. Exactly 50 μL of the compound solution was added to the first well of the microtiter plate and 2-fold serial dilutions were made down each row of the plate. Exactly 50 μL of bacterial inoculum (5 × 10<sup>5</sup> CFU/mL in broth media) was then added to each well giving a total volume of 100 μL/well. The plate was incubated at 37 °C for 18 h and then each well was examined for bacterial growth. The MIC was recorded as the lowest compound concentration

( $\mu\text{M}$ ) required to inhibit 90% of bacterial growth as judged by turbidity of the culture media relative to a row of wells filled with a DMSO standard. Ciprofloxacin was included in a control row at a concentration gradient of 32  $\mu\text{M}$ –0.0156  $\mu\text{M}$ .

**Table S3. Antibacterial activity of compounds in the agar diffusion assay<sup>a-j</sup>**

| Compound                                          | <i>B. subtilis</i>      | <i>S. aureus</i> | <i>M. luteus</i> | <i>M. vaccae</i> | <i>M. smegmatis</i> | <i>P. aeruginosa</i> |                 | <i>E. coli</i>  |                         |                 |
|---------------------------------------------------|-------------------------|------------------|------------------|------------------|---------------------|----------------------|-----------------|-----------------|-------------------------|-----------------|
|                                                   | ATCC 6633               | SG511            | ATCC 10240       | IMET 10670       | MC <sup>2</sup> 155 | K799/wt              | K799/61         | X580            | DC0                     | DC2             |
| <b>6</b>                                          | 21                      | 27               | 20               | 13               | 0                   | 20                   | 24              | 23              | NT                      | NT              |
| <b>7</b>                                          | 15                      | 23               | 23               | 17 P             | 17 V                | 0                    | 16 U            | 20/29<br>U      | 0                       | 14<br>V         |
| <b>8</b>                                          | 0 P                     | 0 P              | 0 P              | H, P             | 0 P                 | 14 U, P              | 16 U, P         | 22 P            | 0 P                     | 0 P             |
| <b>9<sup>e</sup></b>                              | 21                      | 16               | 0                | 0                | 0                   | 0                    | 0               | 26              | 0                       | 0               |
| <b>Ga(acac)<sub>3</sub><sup>e</sup></b>           | 0                       | 0                | 0                | 0                | 0                   | 0                    | 0               | 0               | 0                       | 0               |
| <b>Ga(NO<sub>3</sub>)<sub>3</sub><sup>e</sup></b> | 0                       | 0                | 0                | 0                | 0                   | 0                    | 0               | 0               | 0                       | 0               |
| <b>11<sup>e</sup></b>                             | 0                       | 0                | 0                | 0                | 0                   | 0                    | 0               | 0               | 0                       | 0               |
| <b>12</b>                                         | 0                       | 0                | 0                | 0                | 0                   | 14 U                 | 13 U            | 0               | 0                       | H               |
| <b>16</b>                                         | 17 U                    | 22/29<br>U       | 30               | 16 V             | 0                   | 15 U                 | 25              | 25/38<br>U      | 0                       | 14              |
| <b>17</b>                                         | 14                      | 22               | 18               | 17               | 0                   | 14 U                 | 14 V, P         | 24              | 17 V                    | H               |
| <b>18<sup>e</sup></b>                             | 36                      | 17               | 0                | 24/30<br>U       | 0                   | 0                    | 0               | 26              | 0                       | 0               |
| <b>Cipro</b>                                      | 27/34<br>U <sup>c</sup> | 26 <sup>b</sup>  | 0 <sup>b</sup>   | 19 <sup>b</sup>  | 17 <sup>b</sup>     | 24 <sup>c</sup>      | 28 <sup>c</sup> | 29 <sup>d</sup> | 21/26<br>V <sup>b</sup> | 26 <sup>b</sup> |

<sup>a</sup>Exactly 50  $\mu\text{L}$  of each compound in solution (2 mM in 10:1, MeOH/DMSO) were added to 9 mm wells in agar media (MHII) inoculated with  $\sim 5 \times 10^3$  CFU/mL. Diameters of growth inhibition zones were measured (mm) after incubation at 37 °C for 24 h, or 48 h for *M. vaccae* and *M. smegmatis*.<sup>27-28</sup> Ciprofloxacin (Cipro) was used as a standard at <sup>b</sup>0.015 mM (5  $\mu\text{g}/\text{mL}$ ), <sup>c</sup>0.005 mM and <sup>d</sup>0.001mM in H<sub>2</sub>O. <sup>e</sup>Tested at 0.2 mM. <sup>f</sup>H, hint of inhibition. <sup>g</sup>NT, not tested. <sup>h</sup>P, observed precipitation. <sup>i</sup>U, unclear inhibition zone. <sup>j</sup>V, very unclear inhibition zone.

**Table S4. Minimum Inhibitory Concentration of compounds (MIC  $\mu\text{M}$ ) determined in MHII media + 100  $\mu\text{M}$  2,2'-bipyridine<sup>a-d</sup>**

| Compound     | <i>B. subtilis</i> | <i>S. aureus</i> | <i>M. luteus</i> | <i>M. vaccae</i> | <i>P. aeruginosa</i> |
|--------------|--------------------|------------------|------------------|------------------|----------------------|
|              | ATCC 6633          | SG511            | ATCC 10240       | IMET 10670       | K799/wt              |
| <b>6</b>     | 0.78               | 0.39             | >0.4             | NG               | >200                 |
| <b>7</b>     | 3.13               | 3.13             | >0.4             | -                | >200                 |
| <b>8</b>     | 200                | >200             | 25               | -                | >200                 |
| <b>9</b>     | 1.56               | 25               | 100              | -                | >200                 |
| <b>12</b>    | >200               | >200             | >200             | -                | >200                 |
| <b>16</b>    | 7.8                | 3.9              | 0.003            | -                | >200                 |
| <b>17</b>    | 62.5               | 31.3             | 125              | -                | >200                 |
| <b>18</b>    | <0.1               | 12.5             | 50               | -                | >50                  |
| <b>Cipro</b> | 0.06               | 0.47             | 3.77             | -                | 0.94                 |

<sup>a</sup>MICs were determined by the visual end point broth microdilution method following CLSI guidelines.<sup>29</sup> <sup>b</sup>Reported values are the average of triplicates ( $N = 3$ ). <sup>c</sup>NG, No growth. <sup>d</sup>P, observed precipitation.

## REFERENCES

- (21) Arano, Y.; Matsushima, H.; Tagawa, M.; Koizumi, M.; Endo, K.; Konishi, J.; Yokoyama, A. A Novel Bifunctional Metabolizable Linker for the Conjugation of Antibodies with Radionuclides. *Bioconjugate Chem.* **1991**, *2*, 71-76.
- (23) Collman, J. P.; Groh, S. E. "Mercaptan-Tail" Porphyrins: Synthetic Analogues for the Active Site of Cytochrome P-450. *J. Am. Chem. Soc.* **1982**, *104*, 1391-1403.
- (24) Moreno, A. Y.; Mayorov, A. V.; Janda, K. D. Impact of Distinct Chemical Structures for the Development of a Methamphetamine Vaccine. *J. Am. Chem. Soc.* **2011**, *133*, 6587-6595.
- (27) General description of the modified Kirby-Bauer agar diffusion assay used in this work: Afonin, S.; Glaser, R. W.; Berditchevskaia, M.; Wadhvani, P.; Gührs, K.-H.; Möllmann, U.; Perner, A.; Ulrich, A. S. 4-Fluoro-phenylglycine as a Label for <sup>19</sup>F-NMR Structure Analysis of Membrane Associated Peptides. *ChemBioChem* **2003**, *4*, 1151-1163.
- (28) Murray, P. R.; Baron, E. J.; Pfaller, M. A.; Tenover, F. C.; Tenover, R. H. *Manual of Clinical Microbiology*, 7th ed., American Society for Microbiology: Washington, DC, 1999.
- (29) *Methods for Dilution Antimicrobial Susceptibility Tests for Bacteria that Grow Aerobically*, 8th ed.; Villanova, PA; Clinical and Laboratory Standards Institute (CLSI), **2009**, approved standard document M07-A7.
- (32) Tardibono, L. P.; Miller, M. J. Synthesis and Anticancer Activity of New Hydroxamic Acid Containing 1,4-Benzodiazepines. *Org. Lett.* **2009**, *11*, 1575-1578.
- (33) De Figueiredo, R. M.; Oczipka, P.; Froehlich, R.; Christmann, M. Synthesis of 4-Maleimidobutyric Acid and Related Maleimides. *Synthesis* **2008**, *8*, 1316-1318.

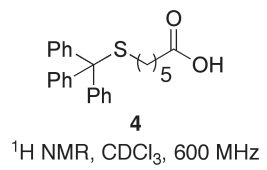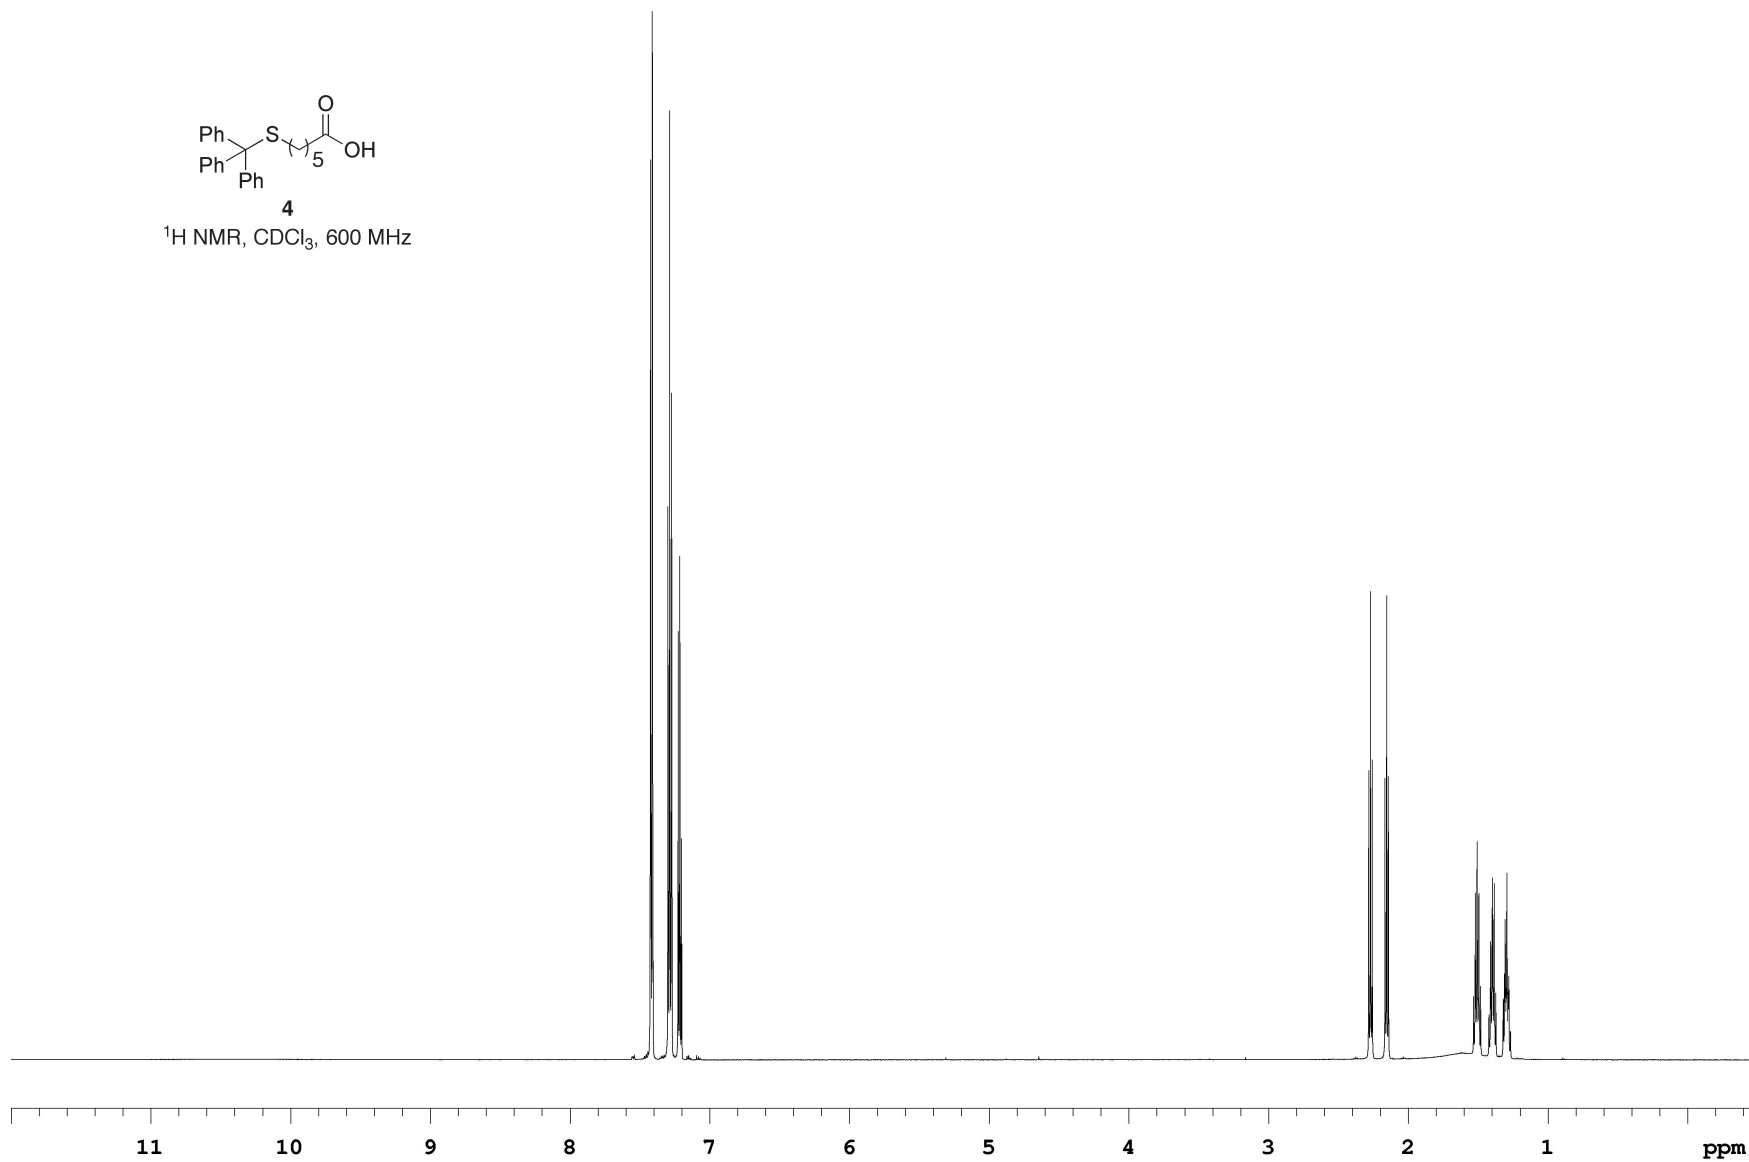



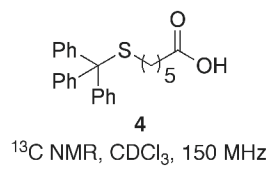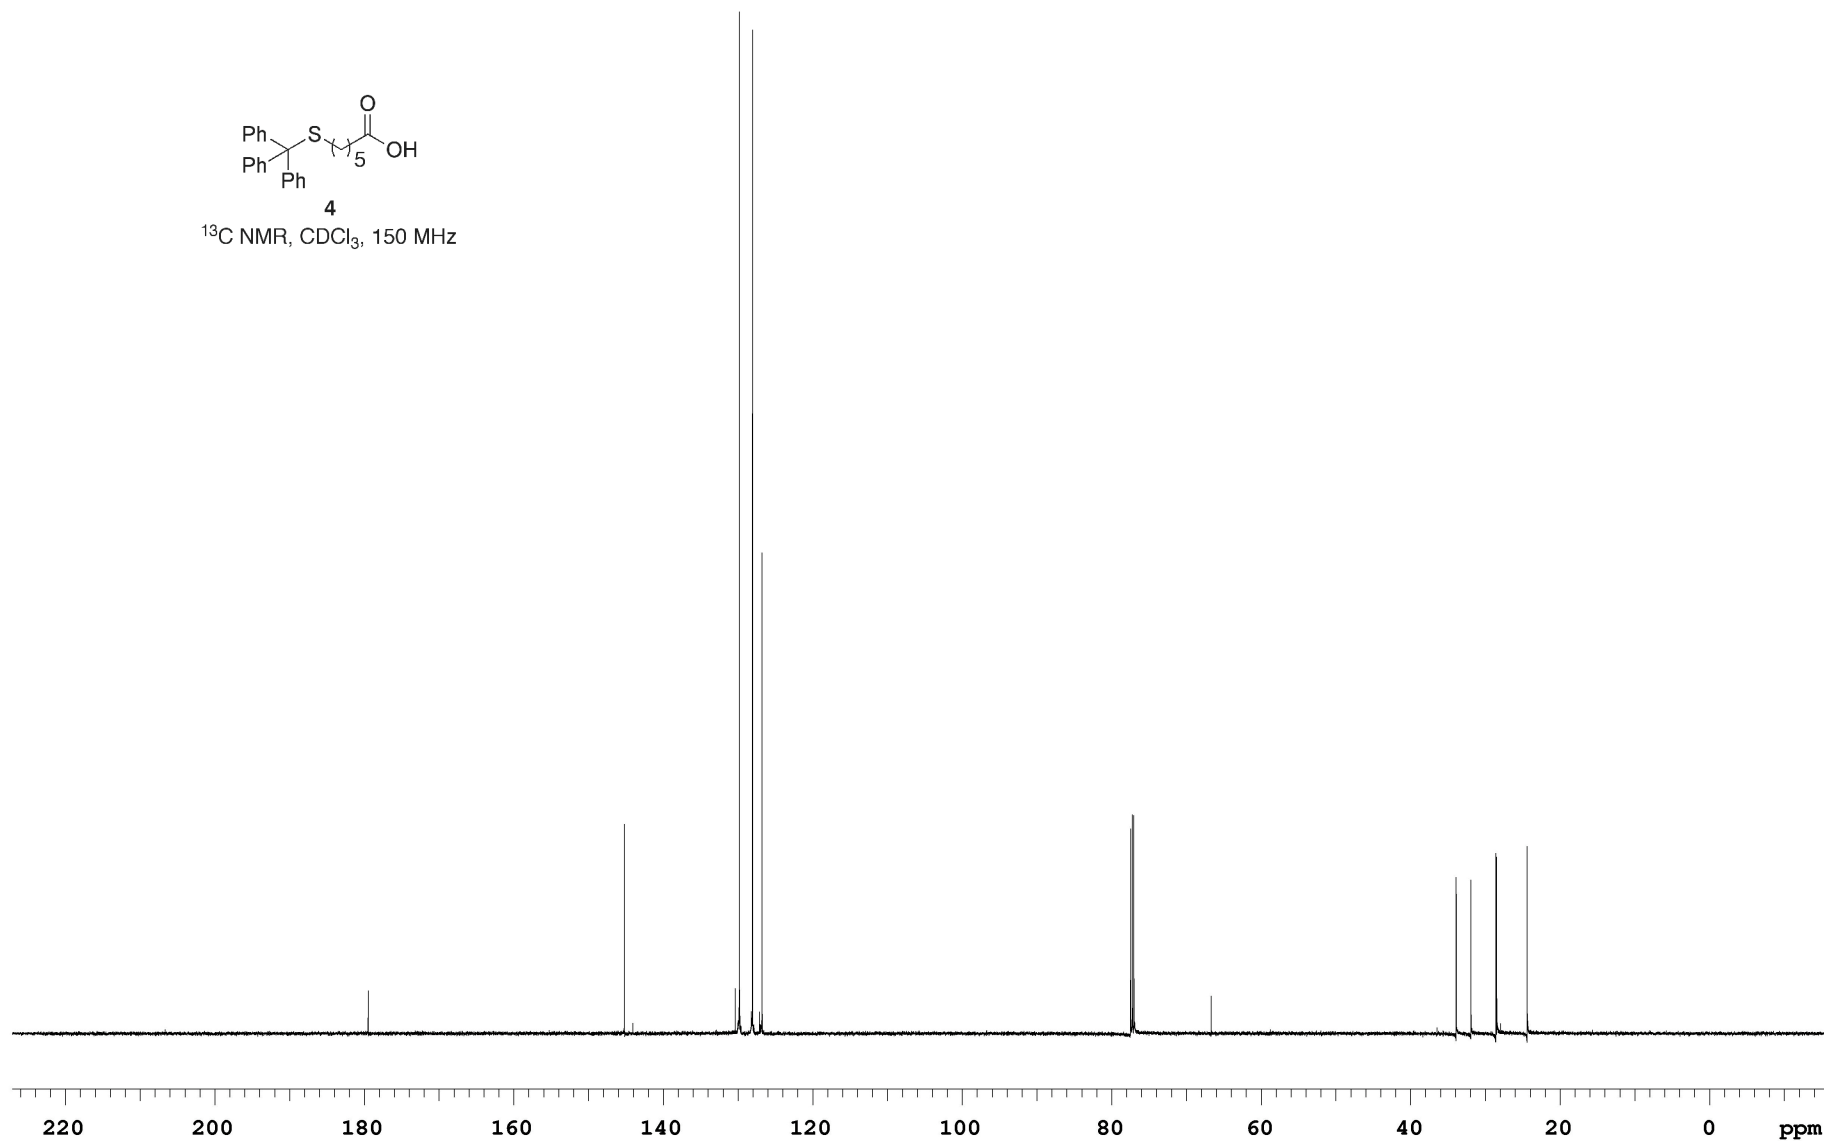



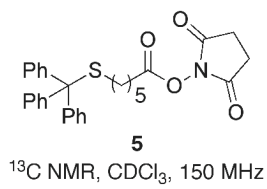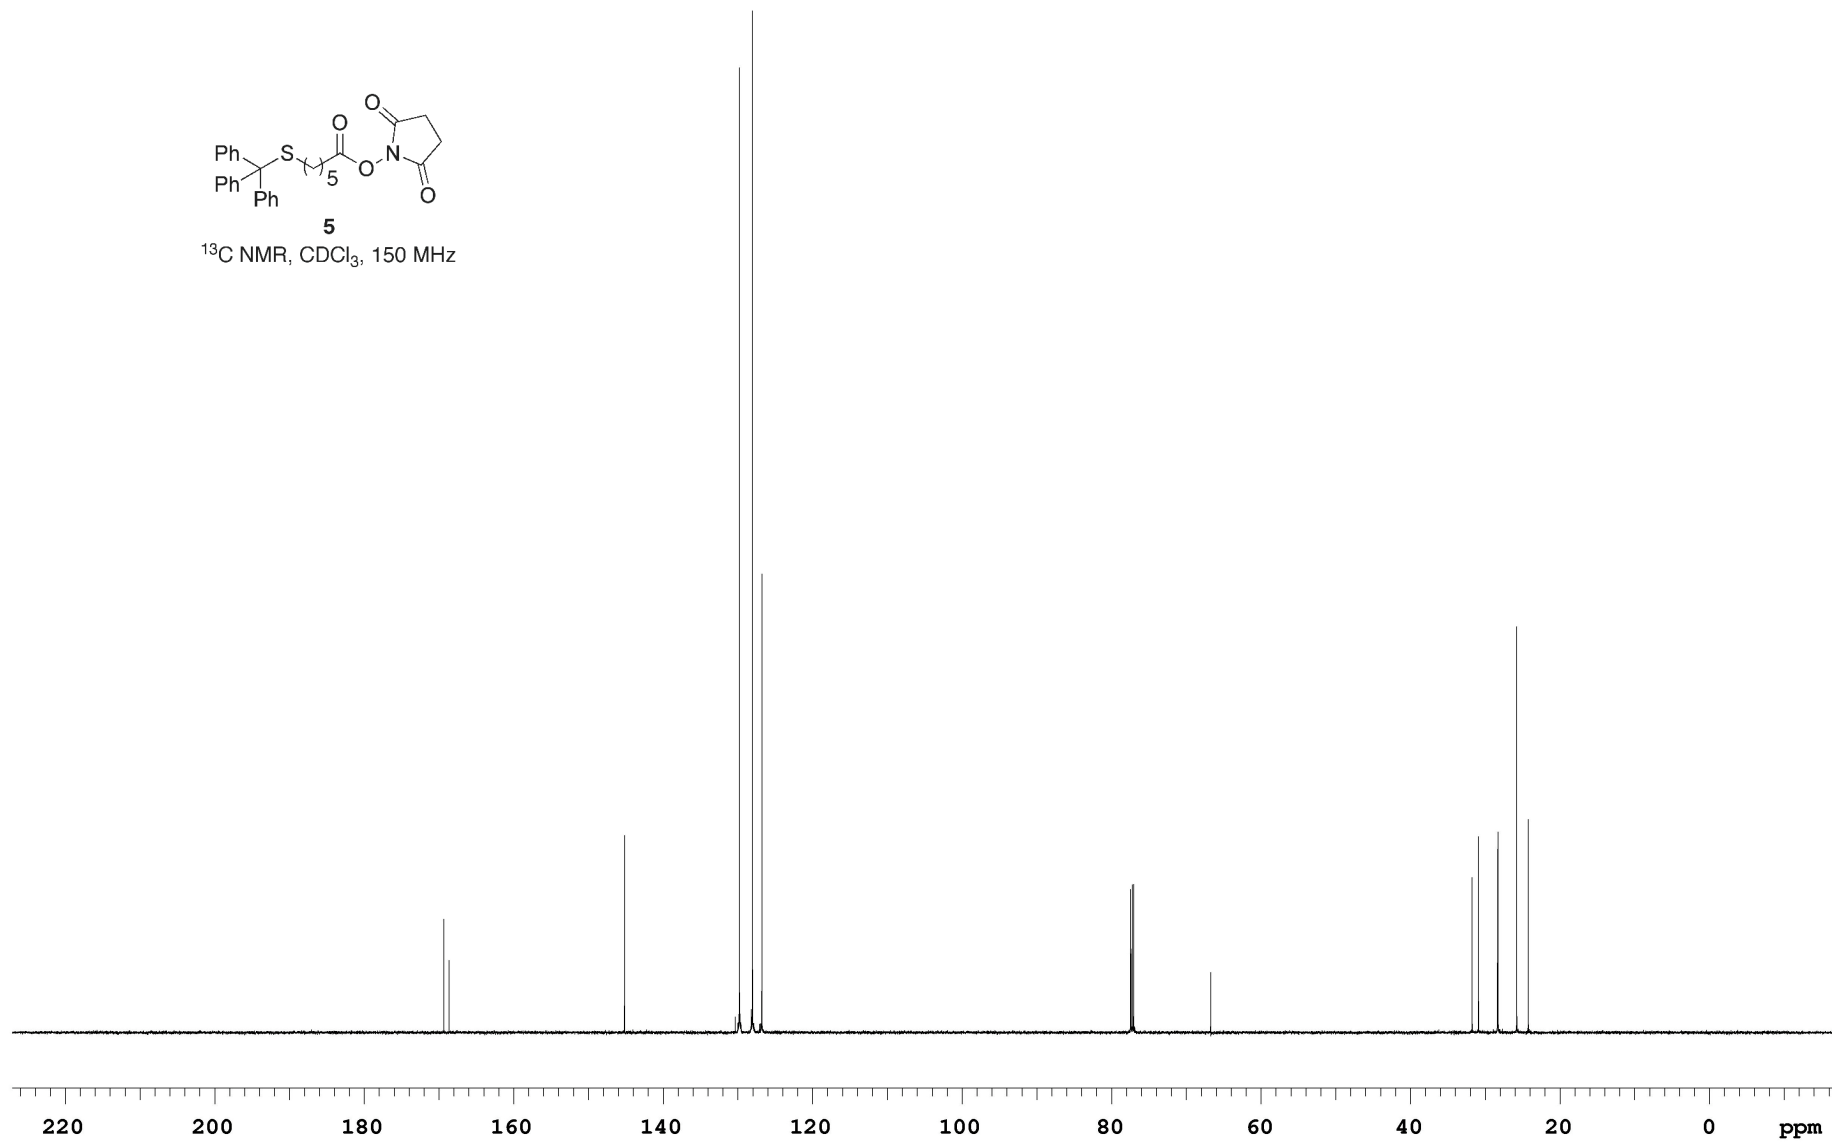



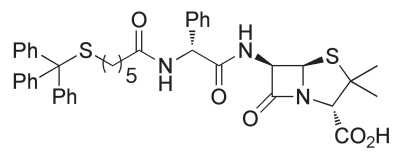

$^{13}\text{C}$  NMR,  $\text{CD}_3\text{OD}$ , 150 MHz

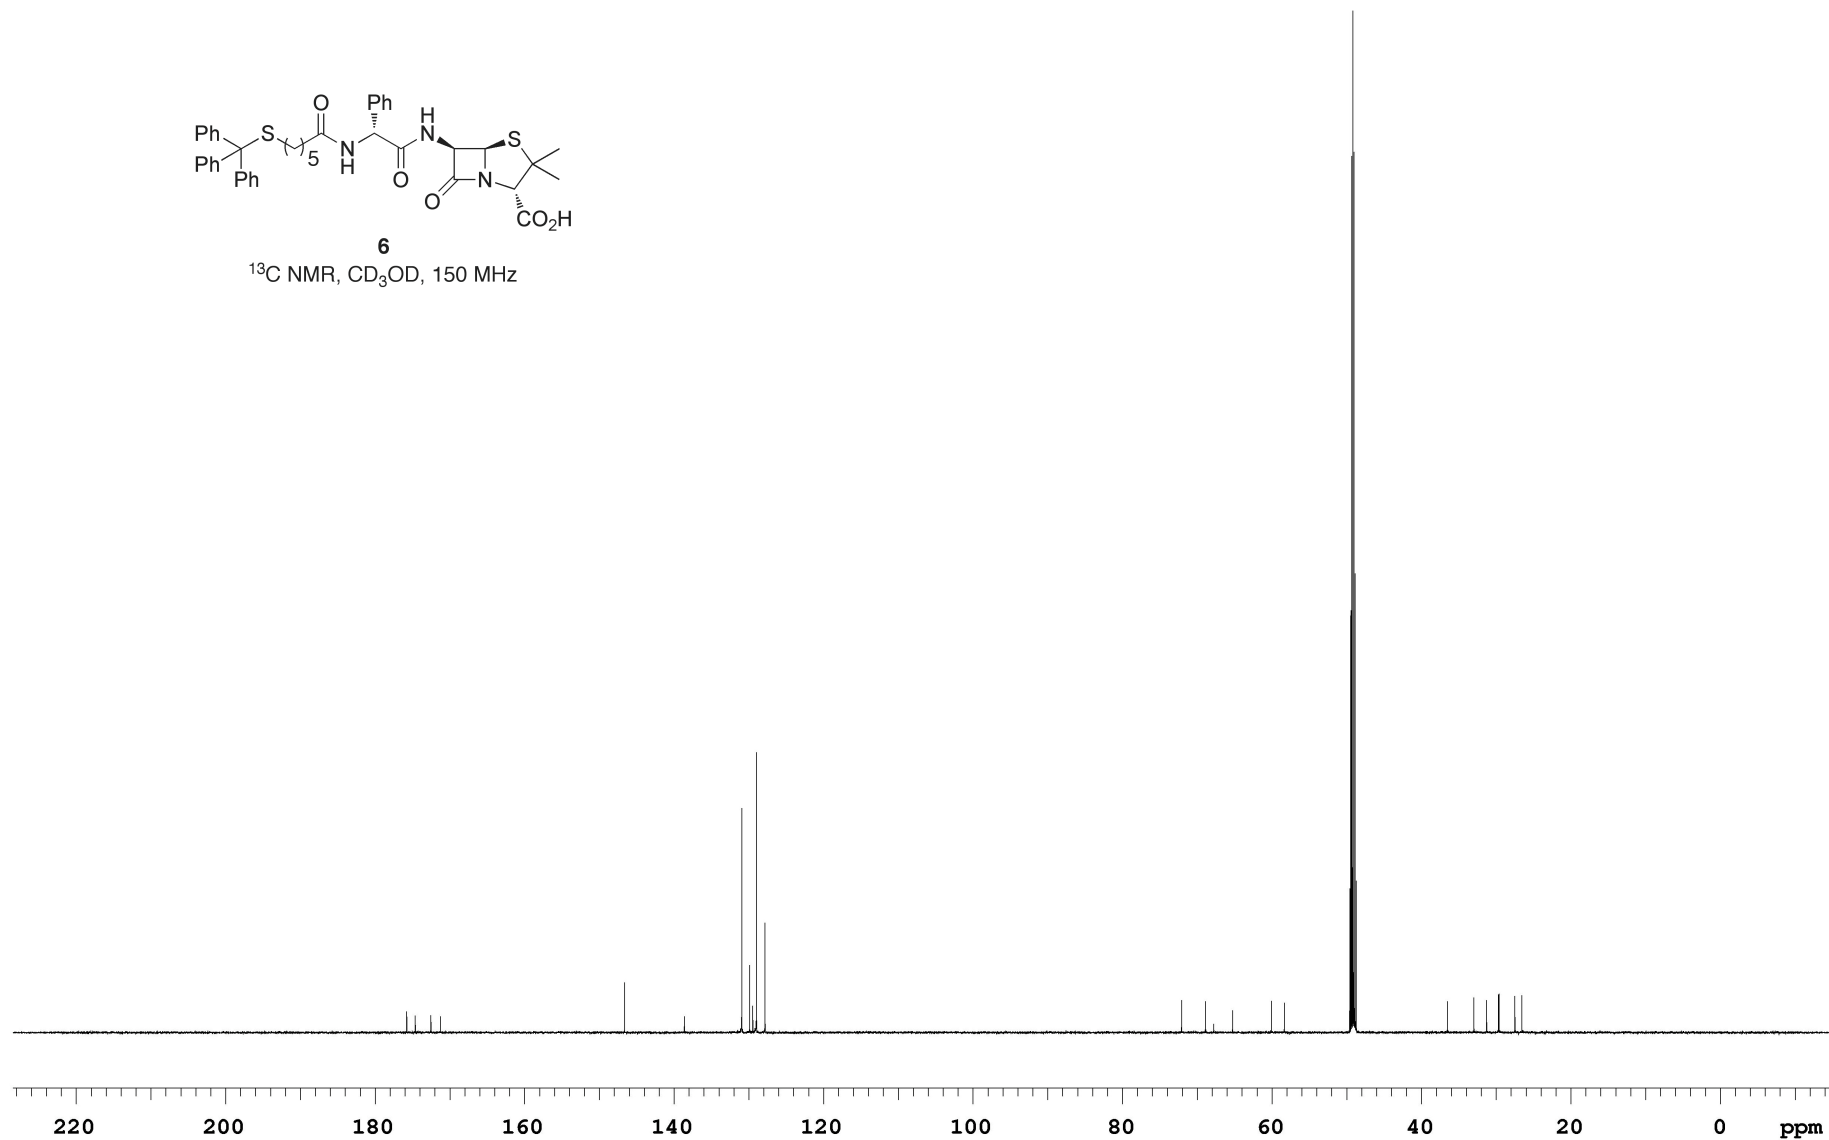

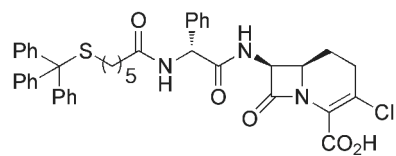

$^1\text{H NMR}$ ,  $\text{CDCl}_3$ , 600 MHz

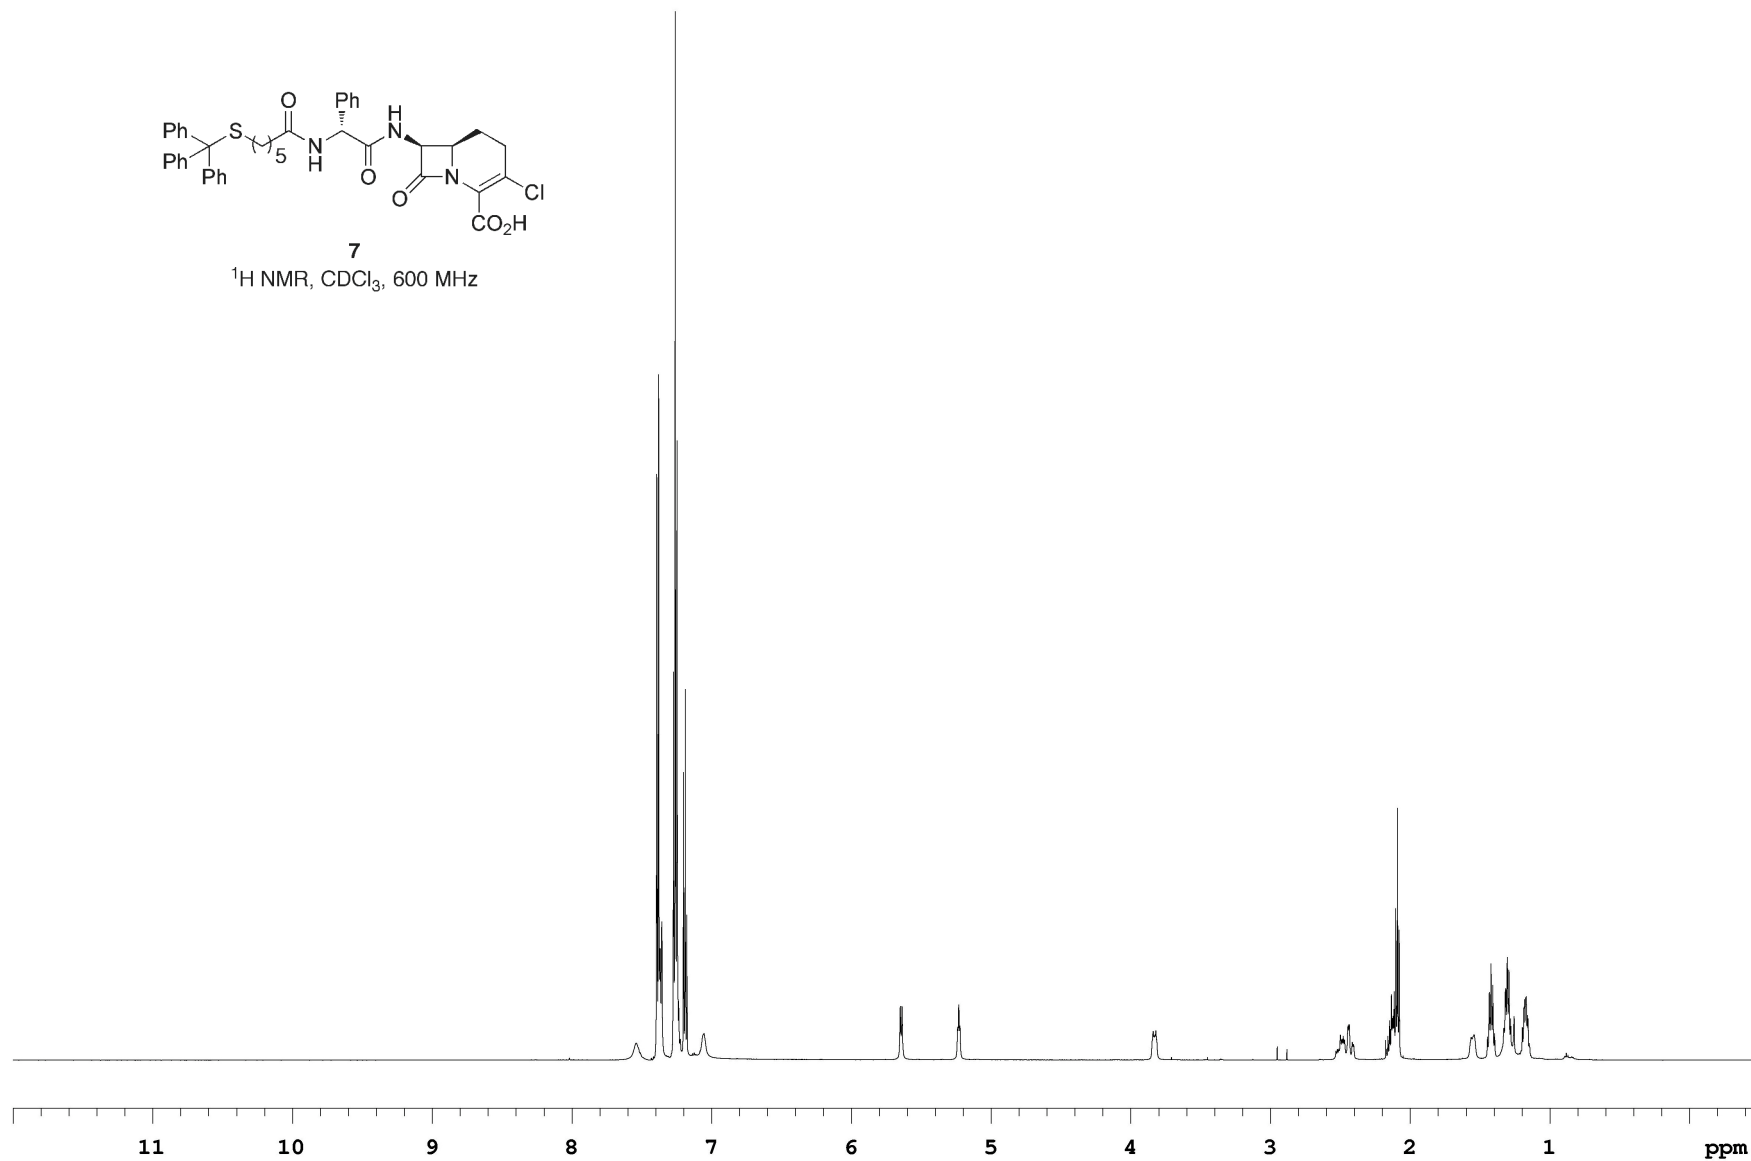

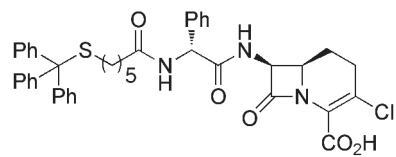

10

<sup>13</sup>C NMR, CDCl<sub>3</sub>, 150 MHz

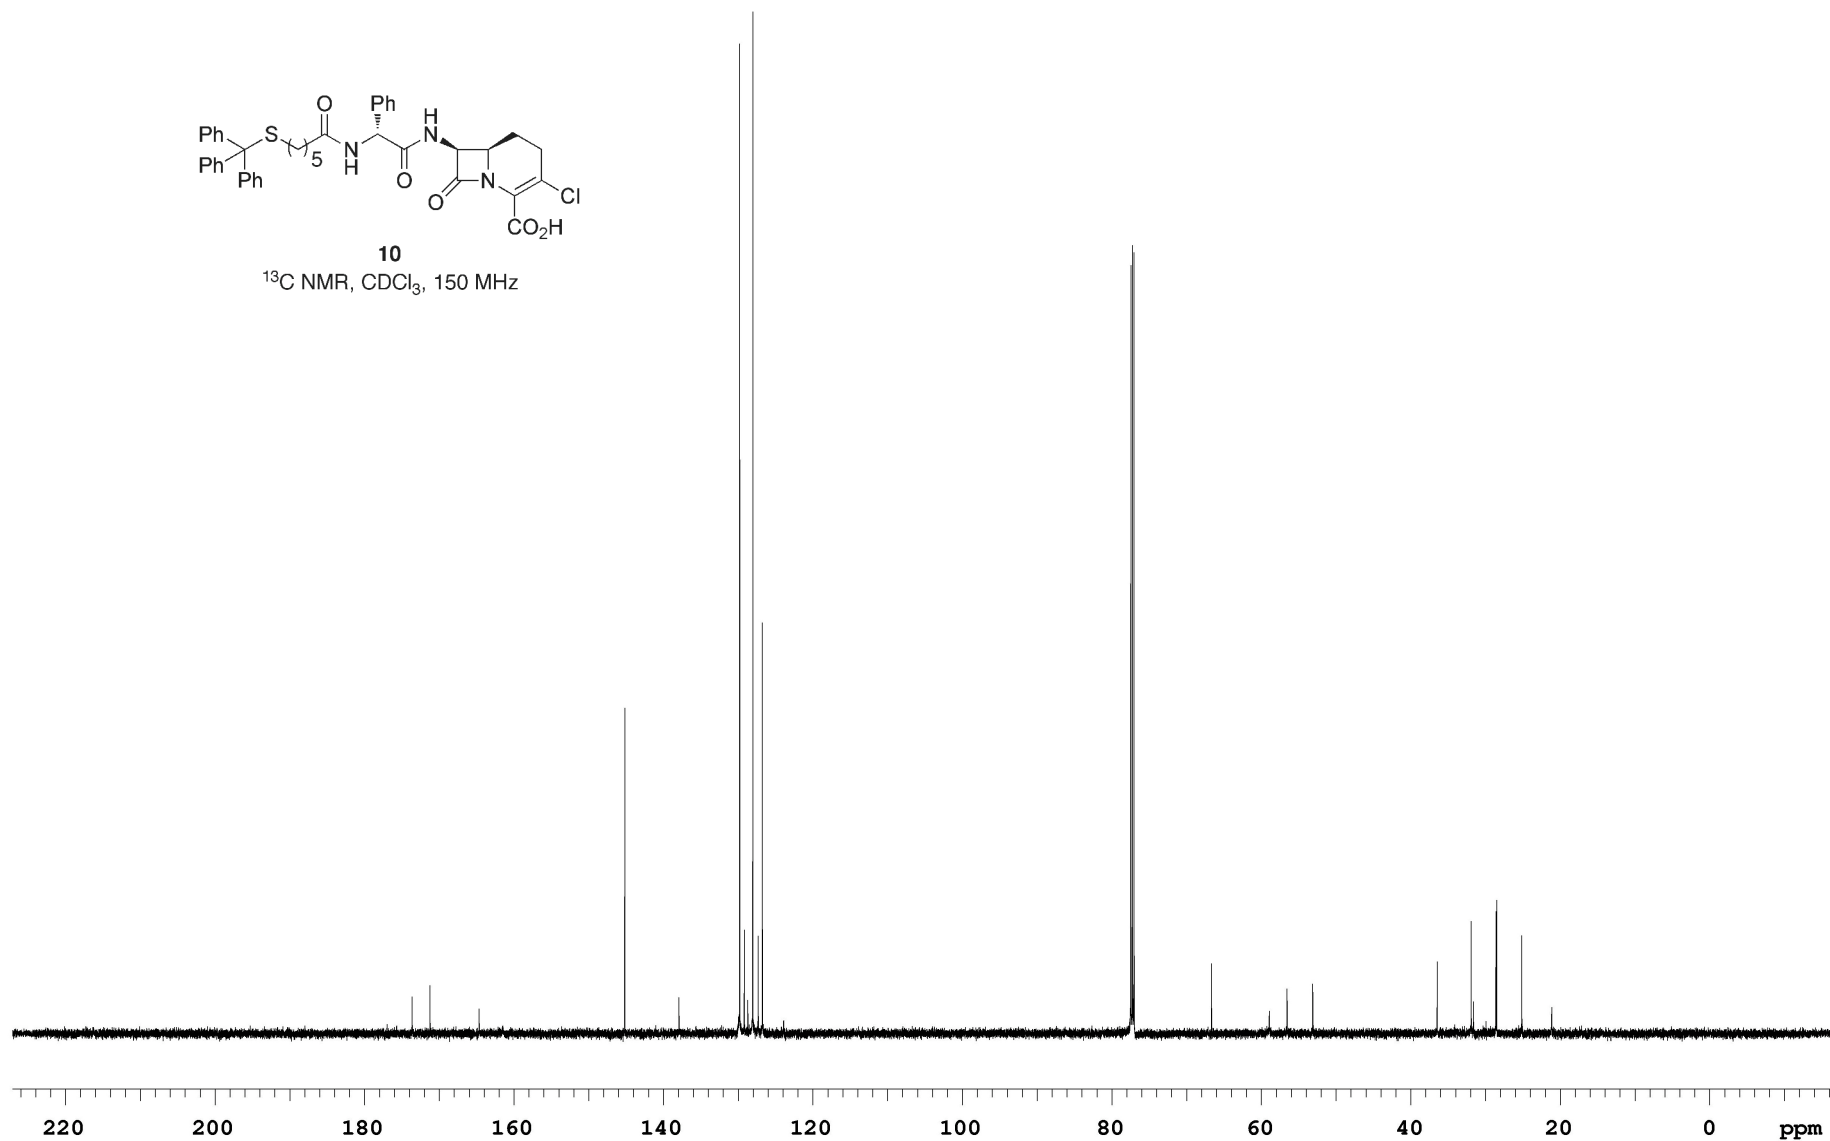

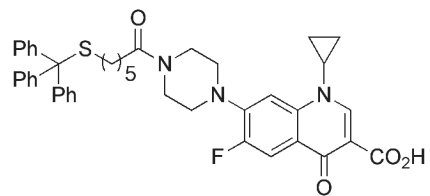

**8**  
<sup>1</sup>H NMR, CDCl<sub>3</sub>, 500 MHz

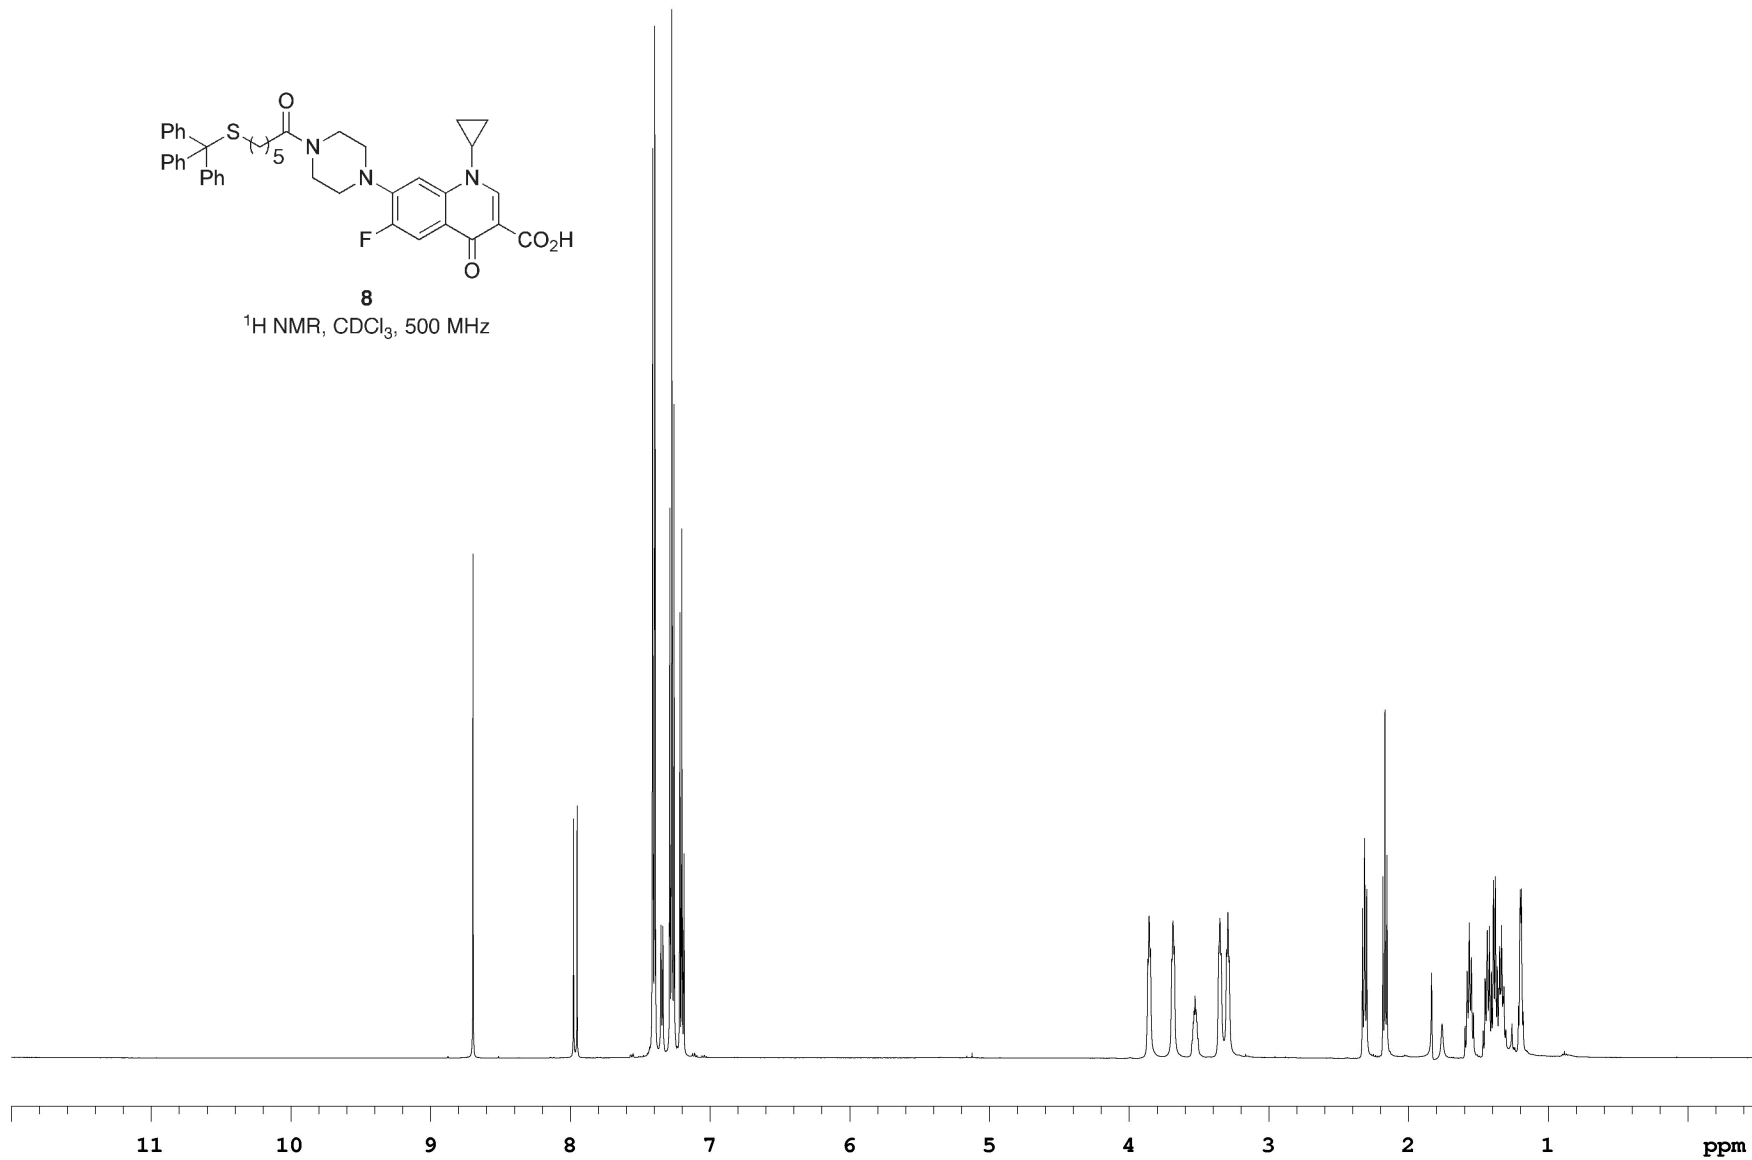



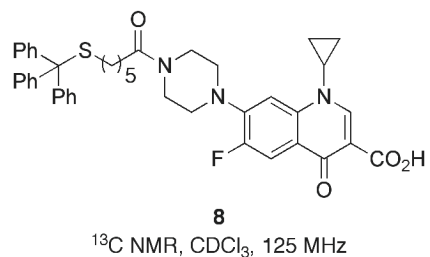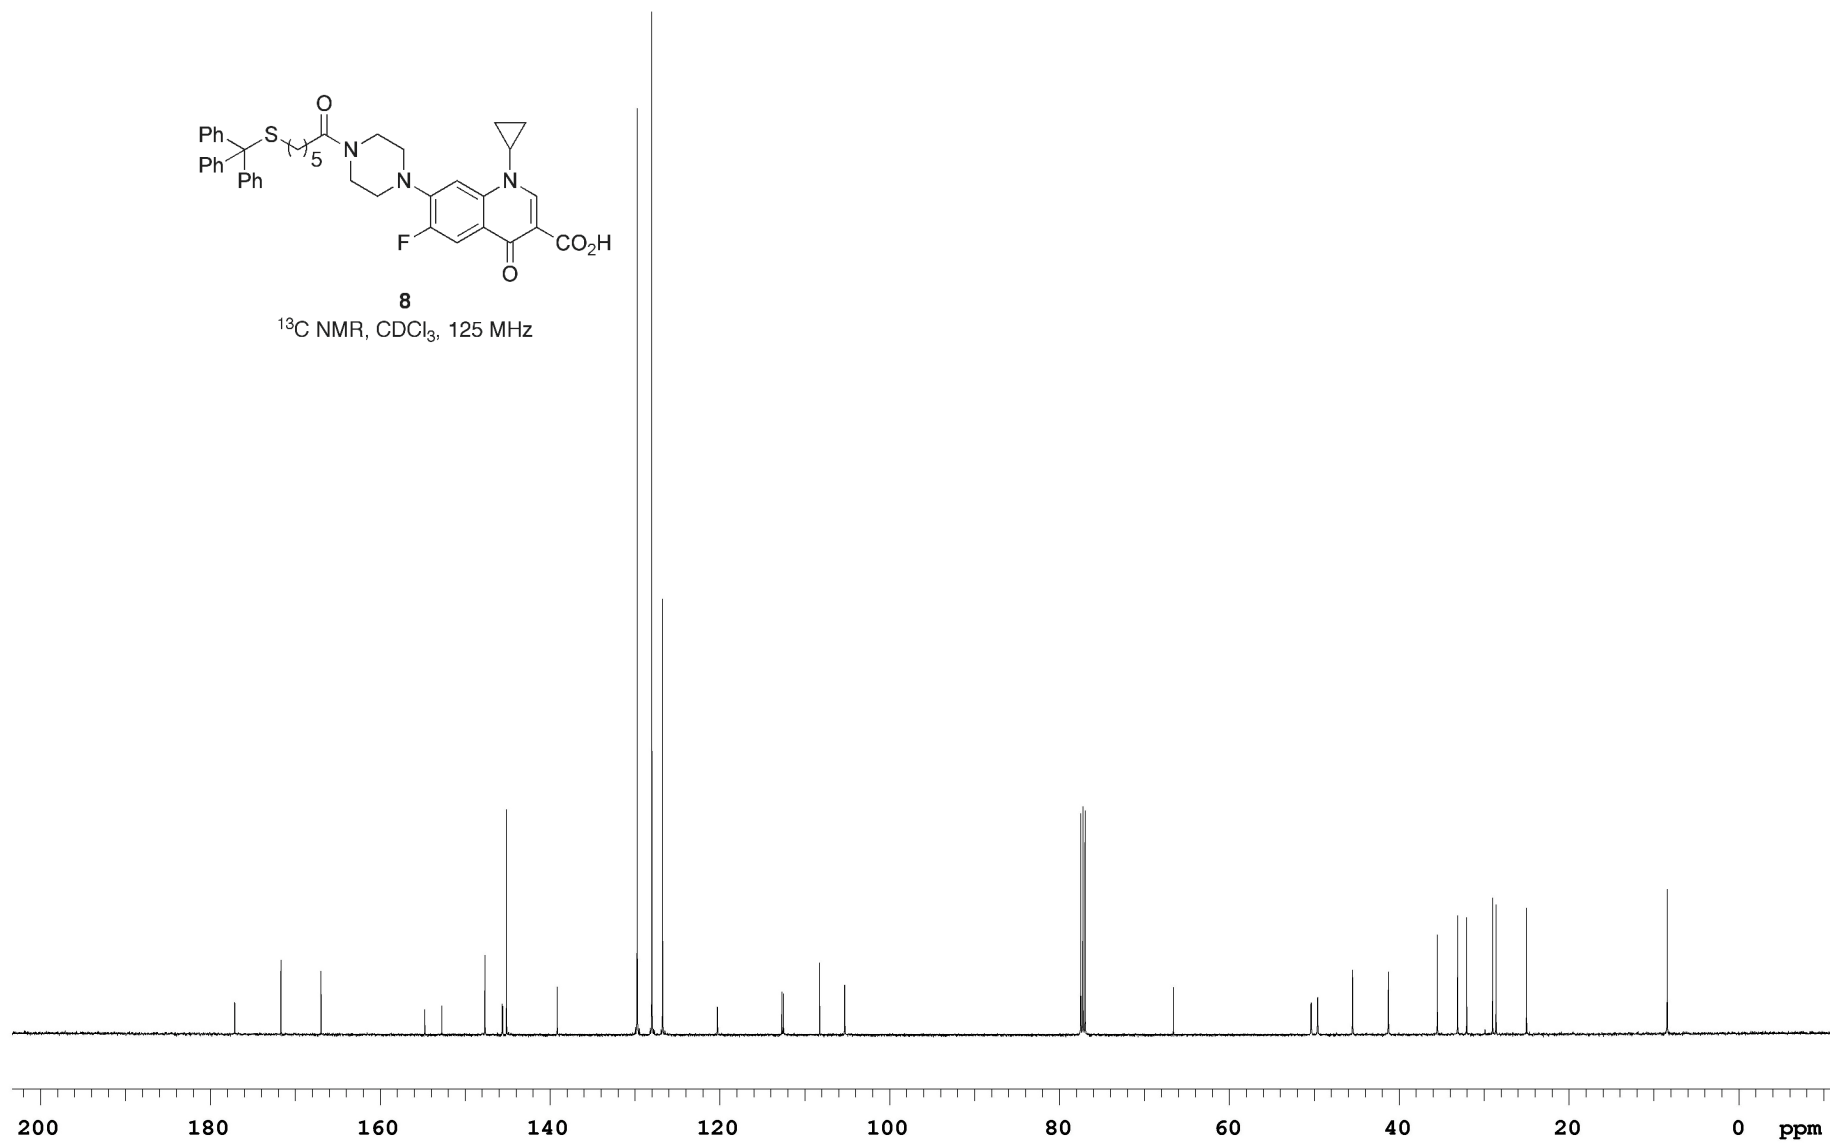

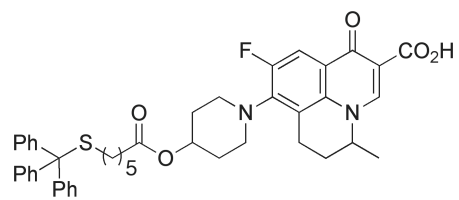

**9**

$^1\text{H NMR}$ ,  $\text{CDCl}_3$ , 600 MHz

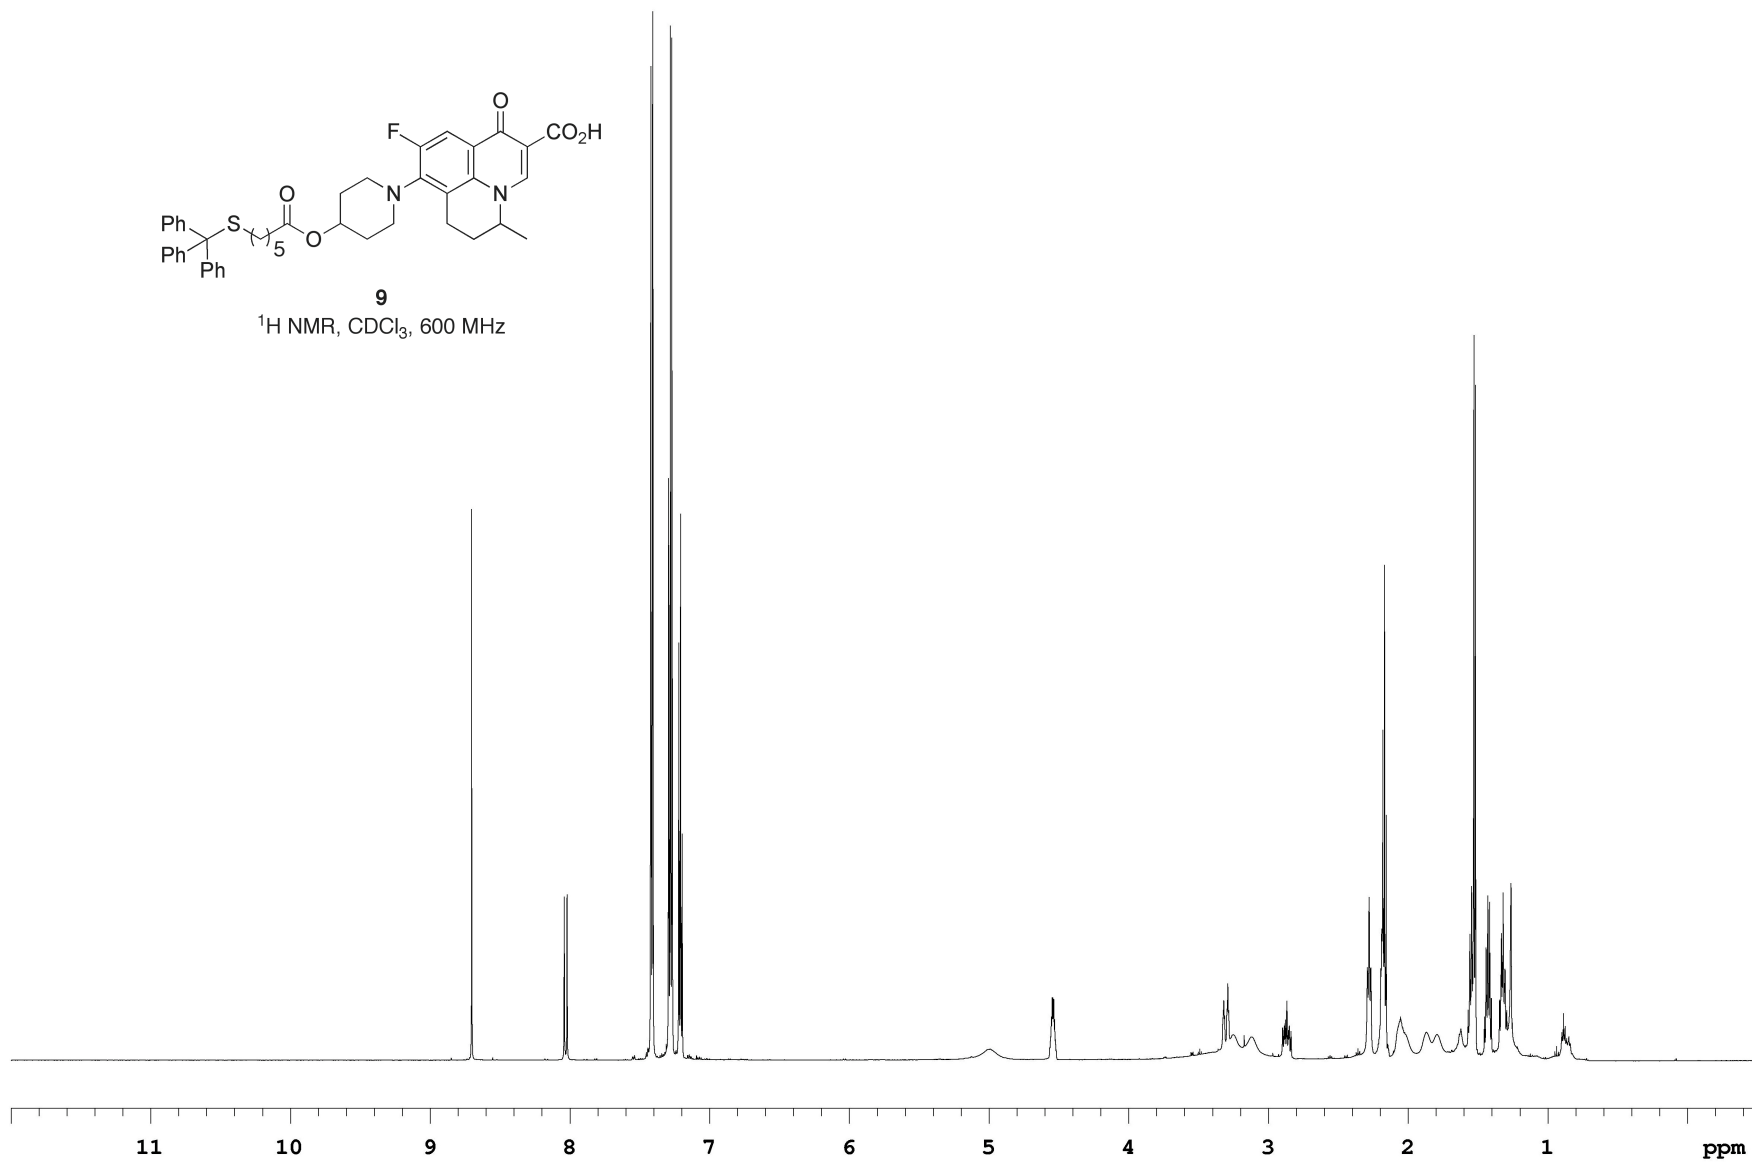

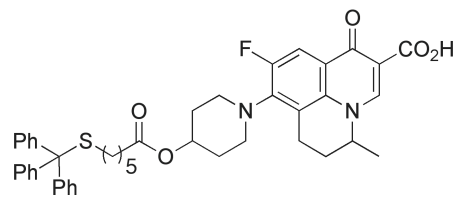

**9**  
 $^{13}\text{C}$  NMR,  $\text{CDCl}_3$ , 150 MHz

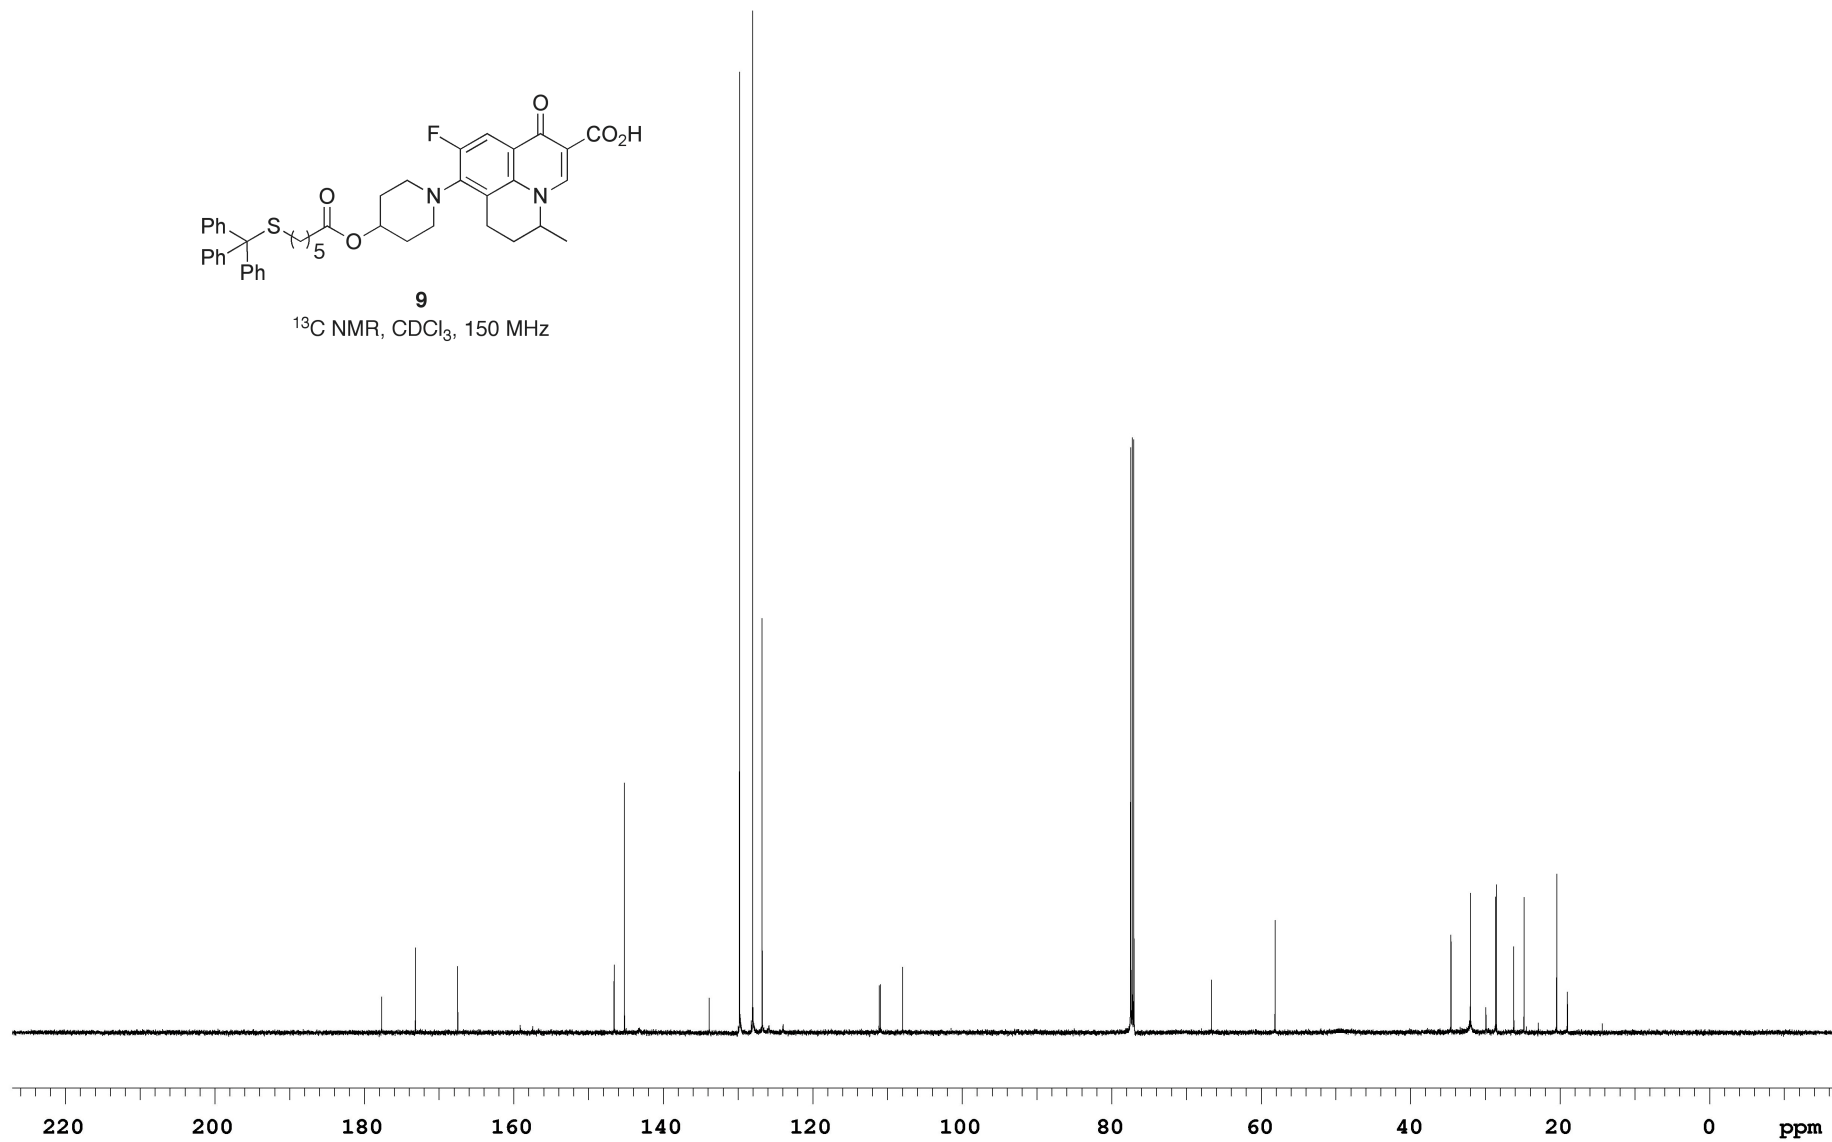

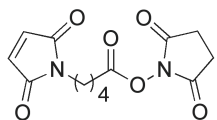

**10**

<sup>1</sup>H NMR, CDCl<sub>3</sub>, 600 MHz

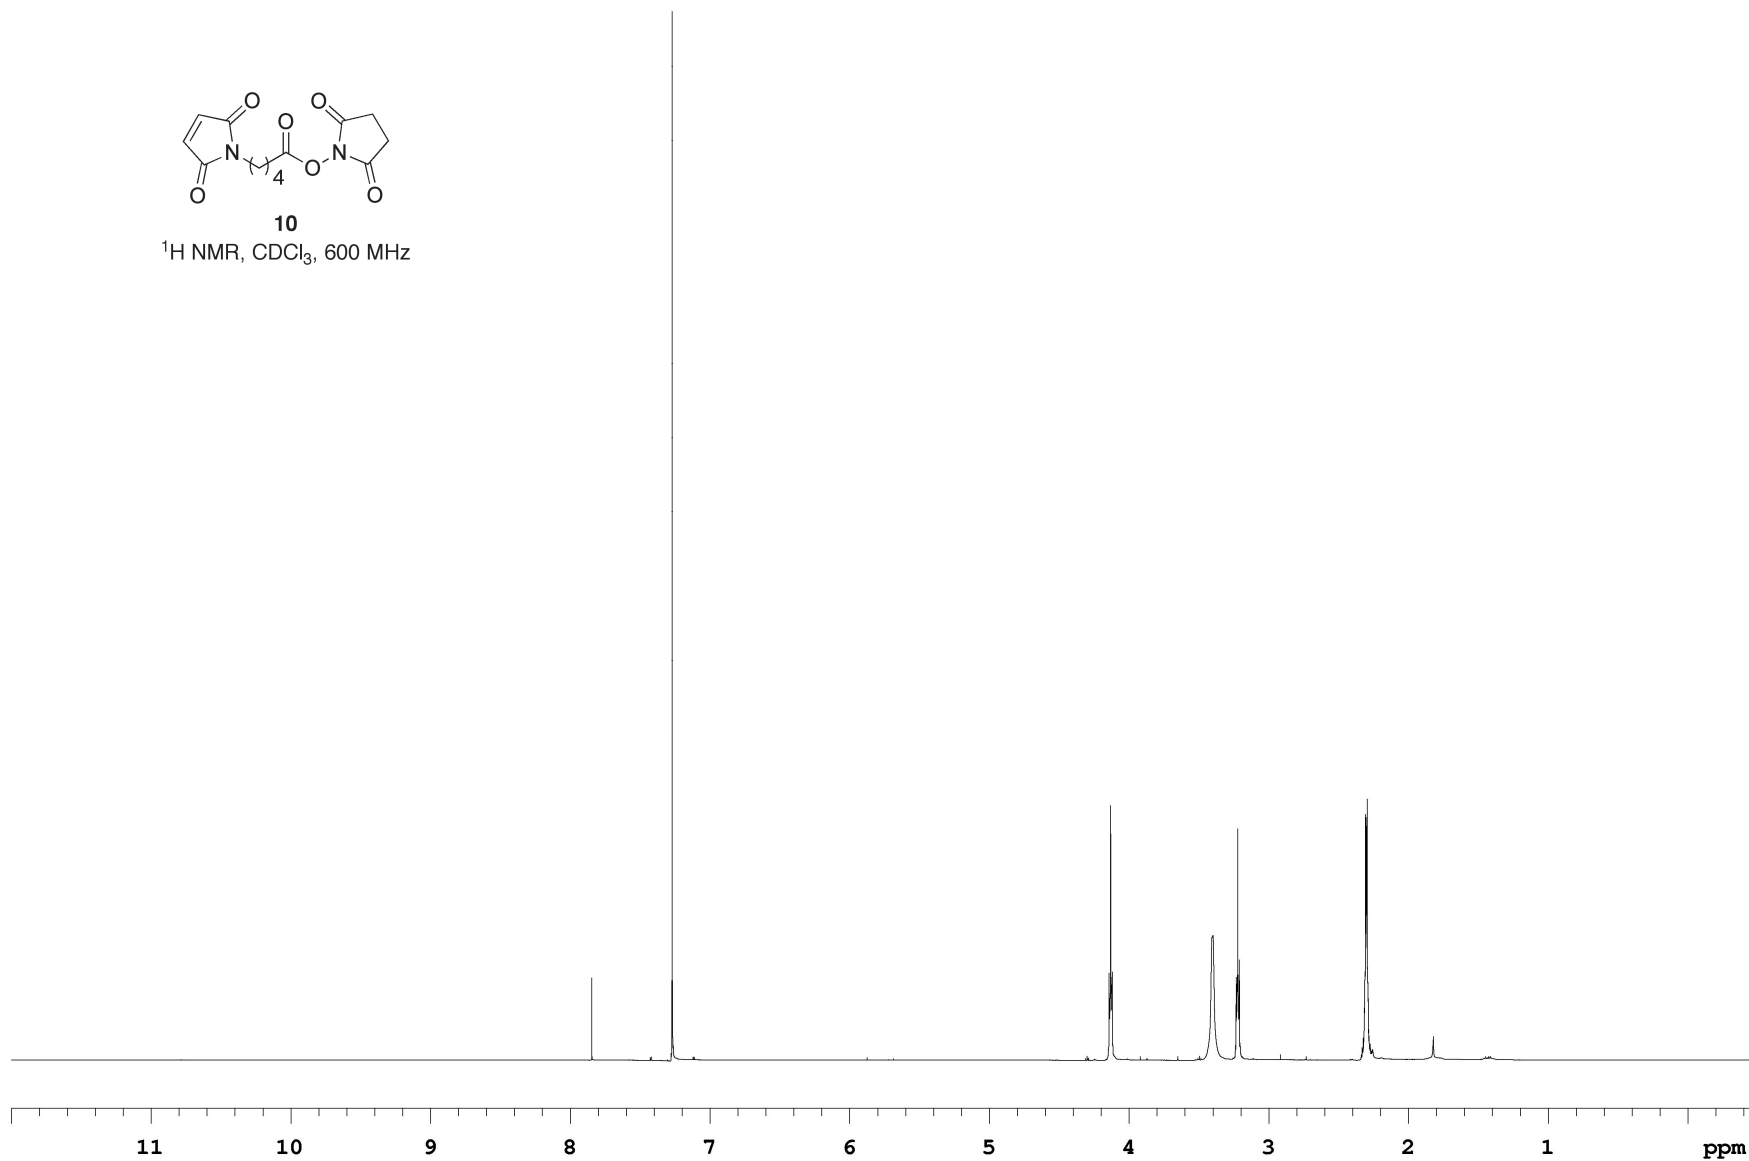

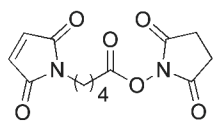

**10**

$^{13}\text{C}$  NMR,  $\text{CDCl}_3$ , 150 MHz

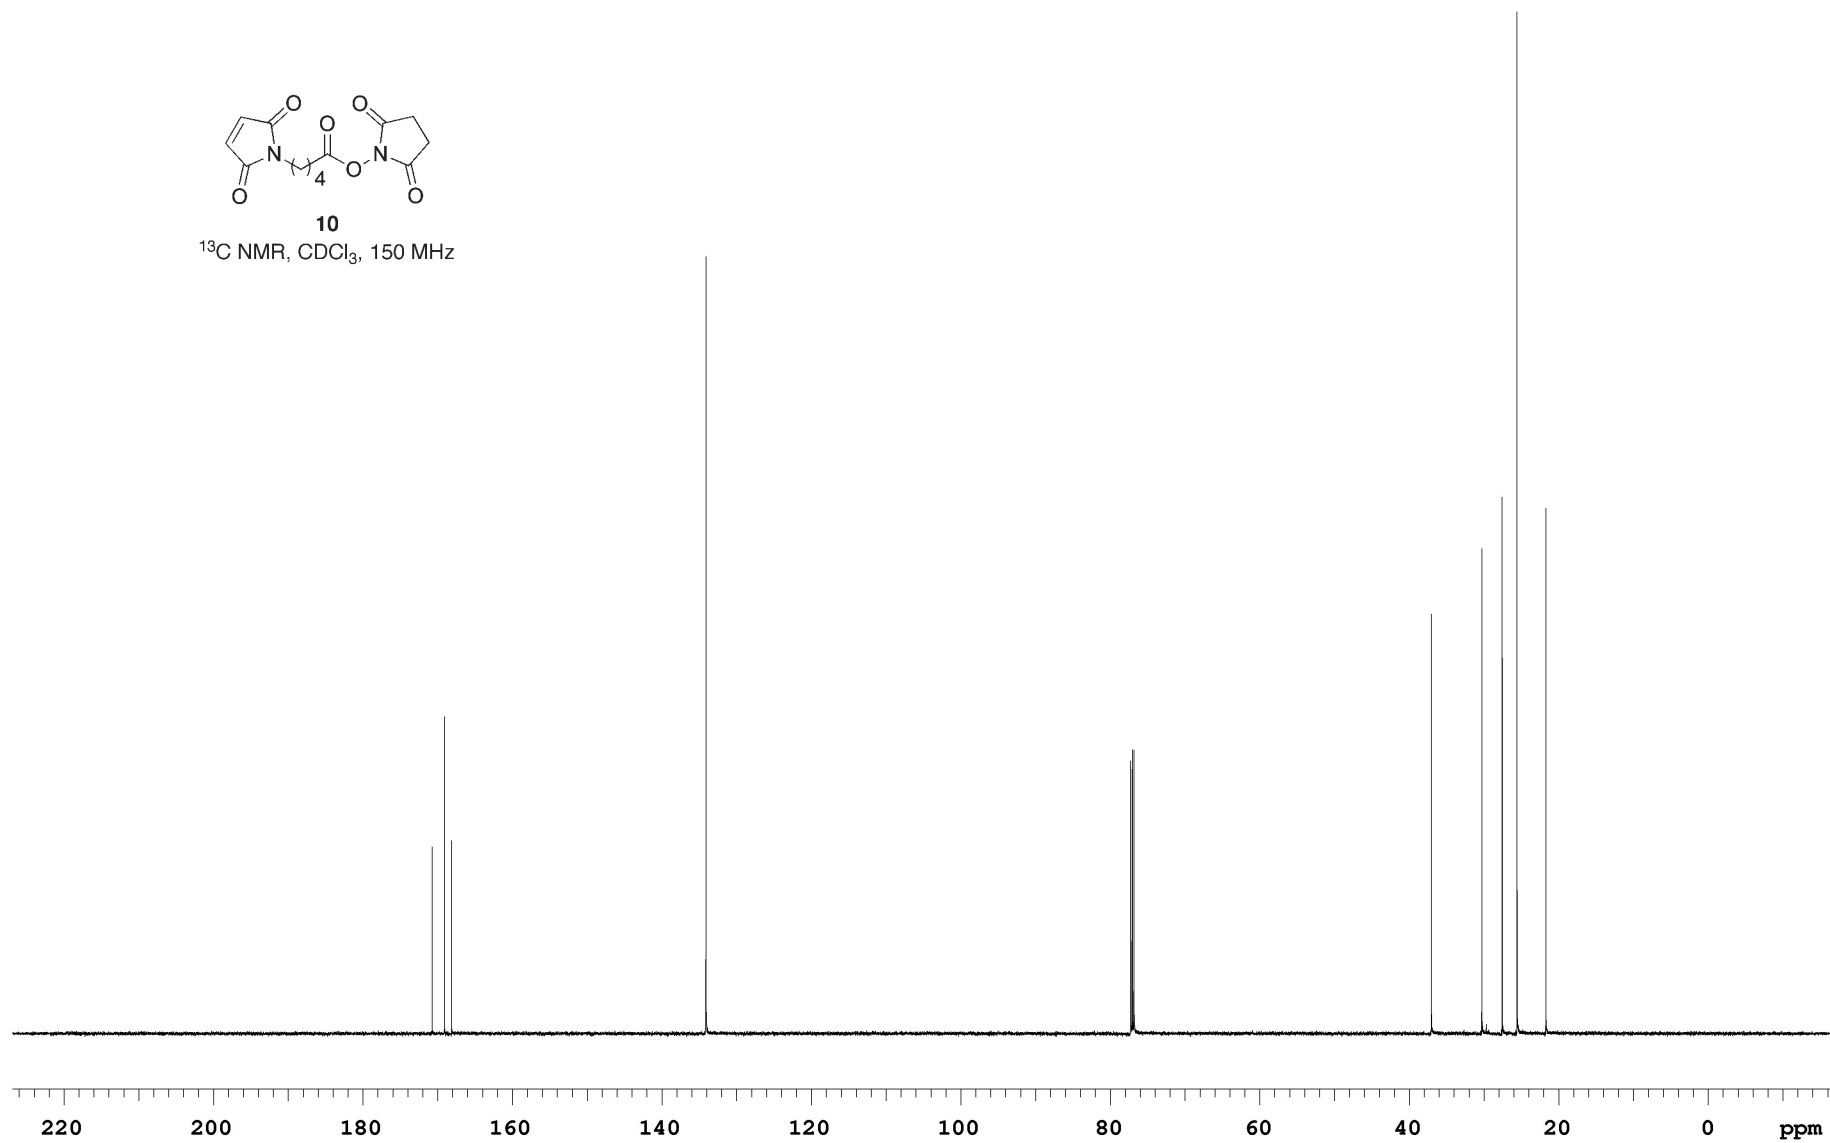





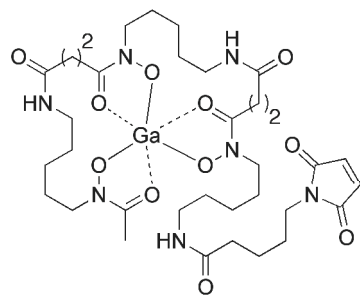

**12**  
 $^1\text{H NMR}$ ,  $\text{CDCl}_3$ , 600 MHz

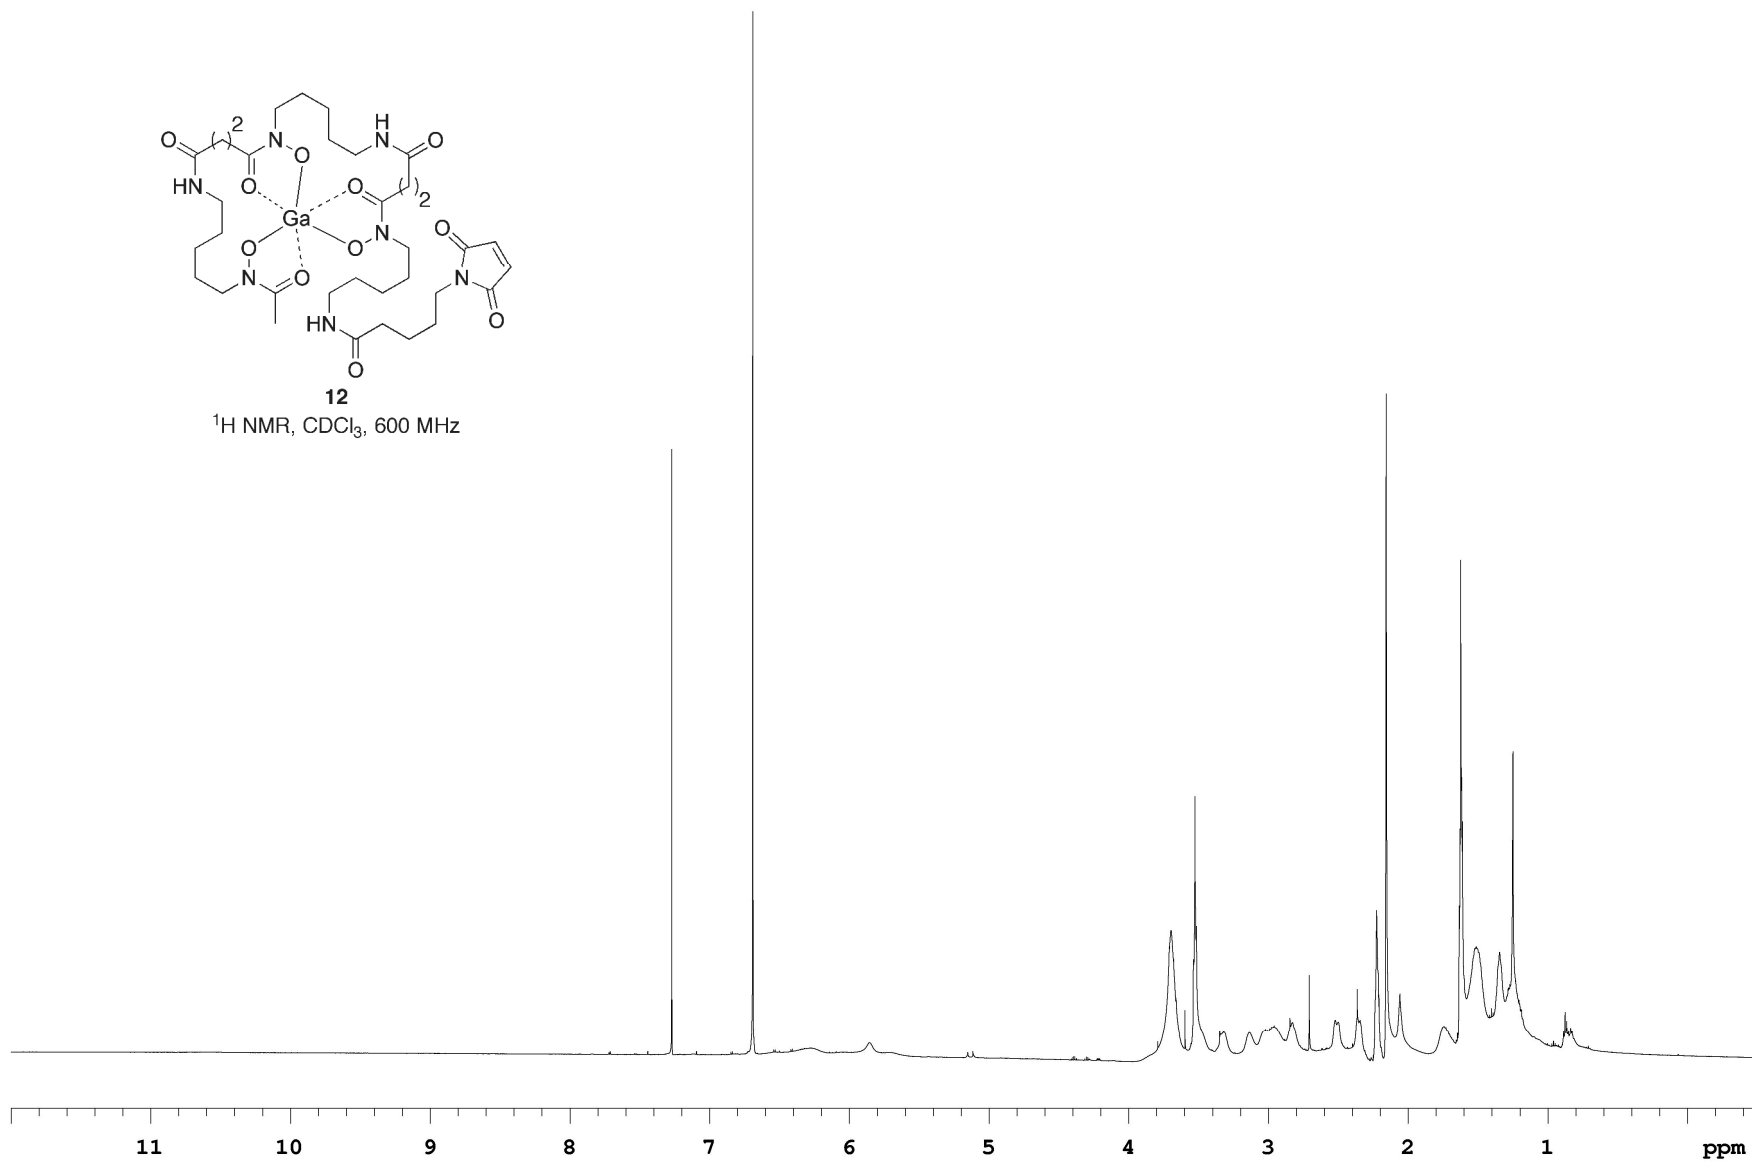



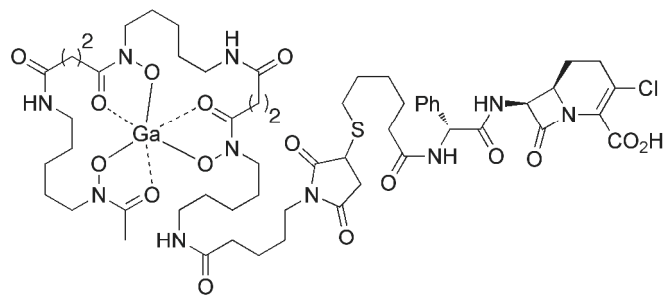

**16**

$^1\text{H NMR}$ ,  $\text{CDCl}_3$ , 600 MHz

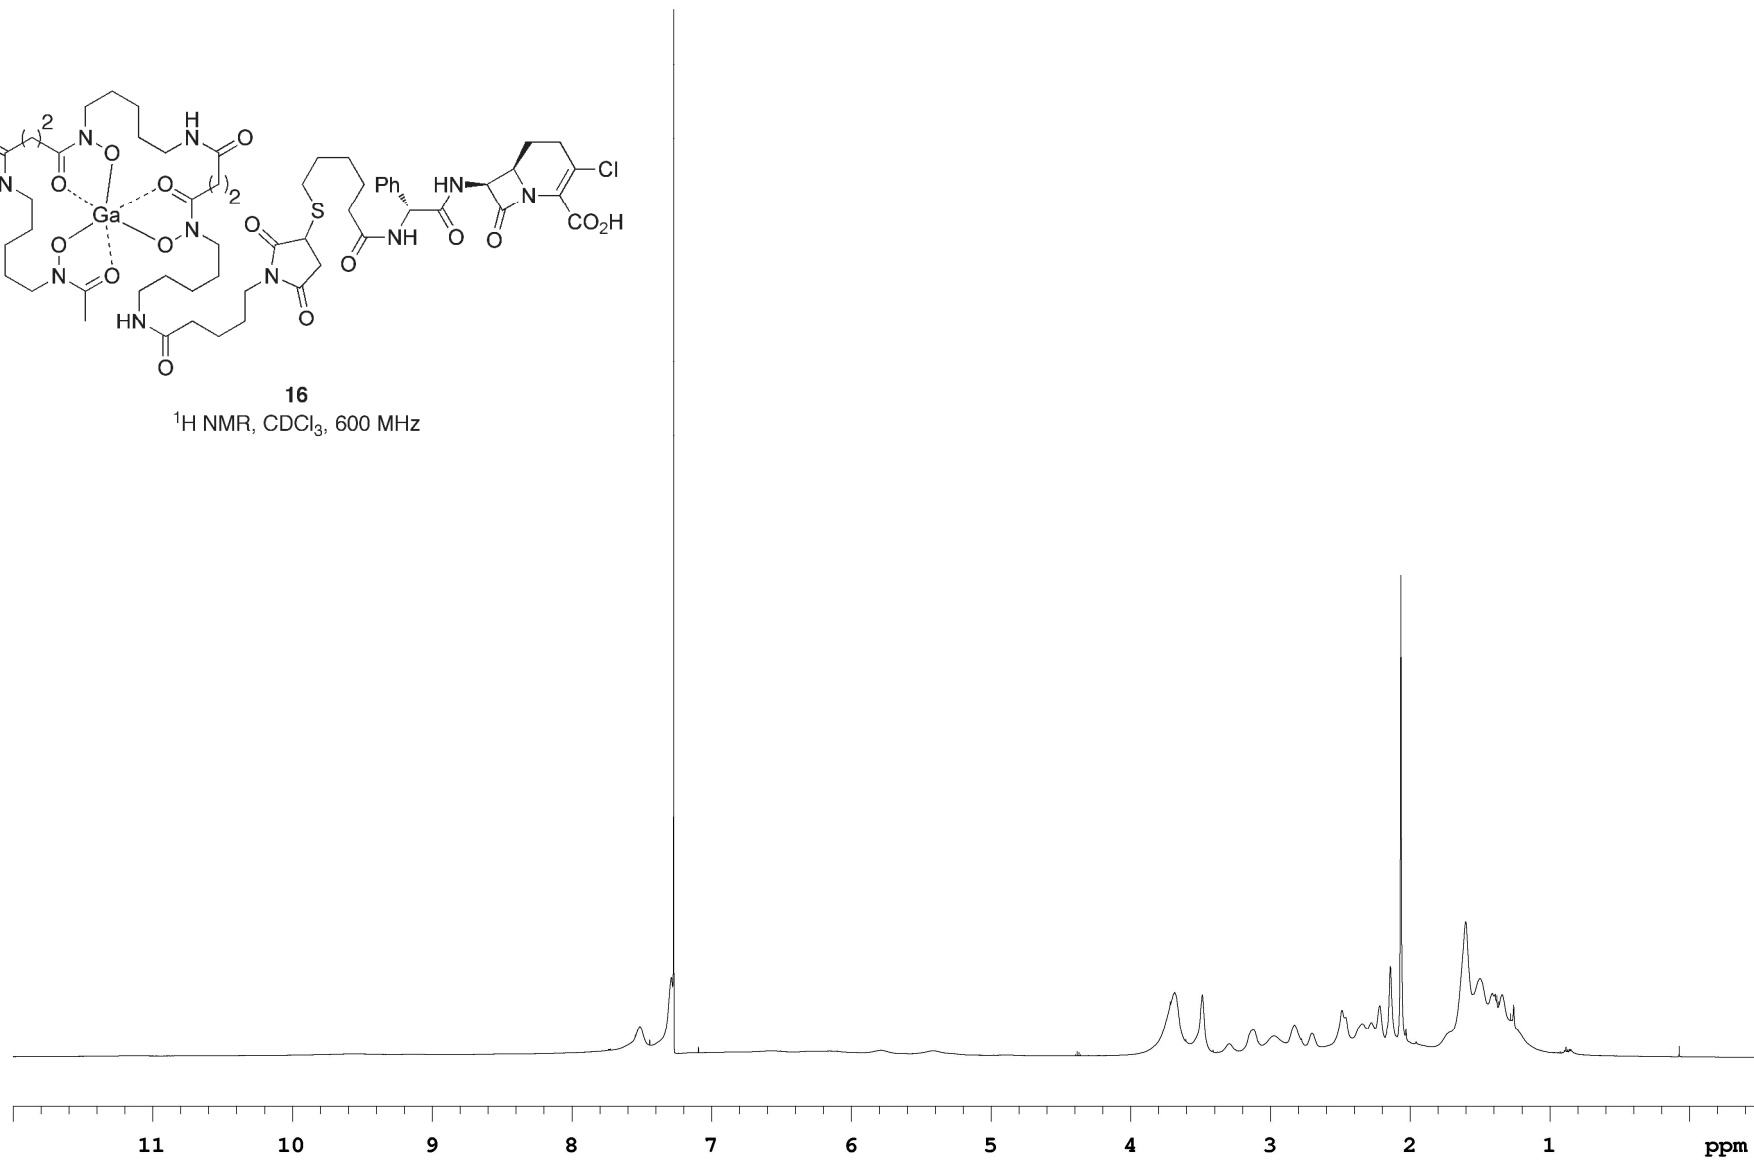

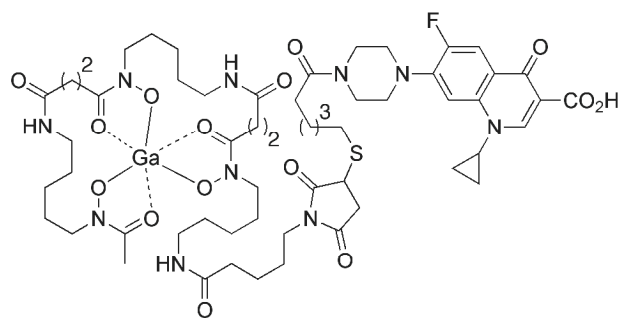

17  
<sup>1</sup>H NMR, CDCl<sub>3</sub>, 600 MHz

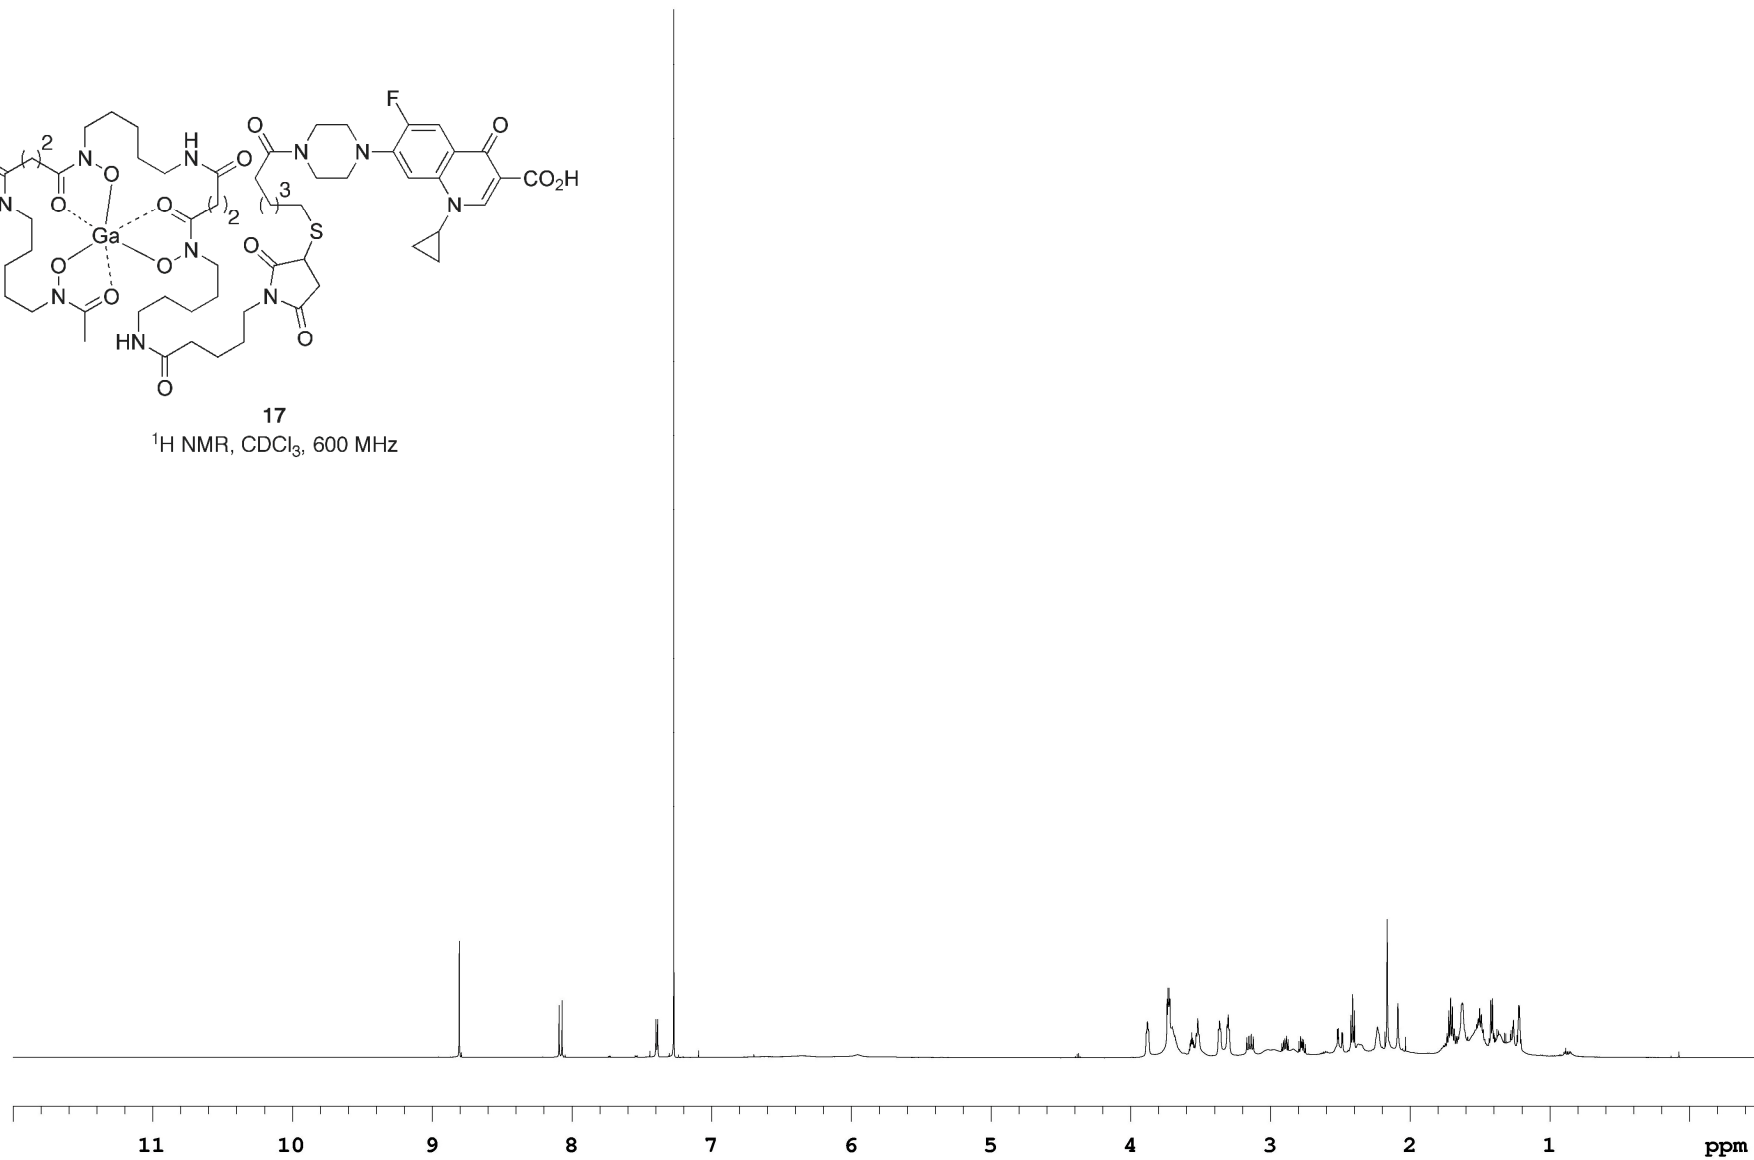

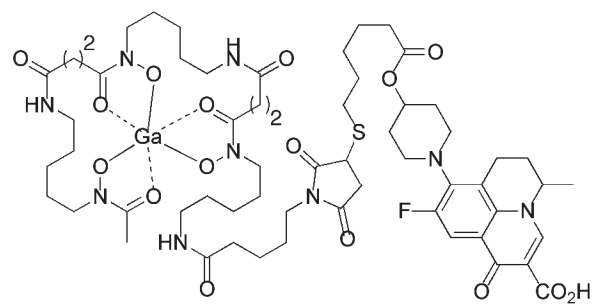

**18**

<sup>1</sup>H NMR, CDCl<sub>3</sub>, 600 MHz

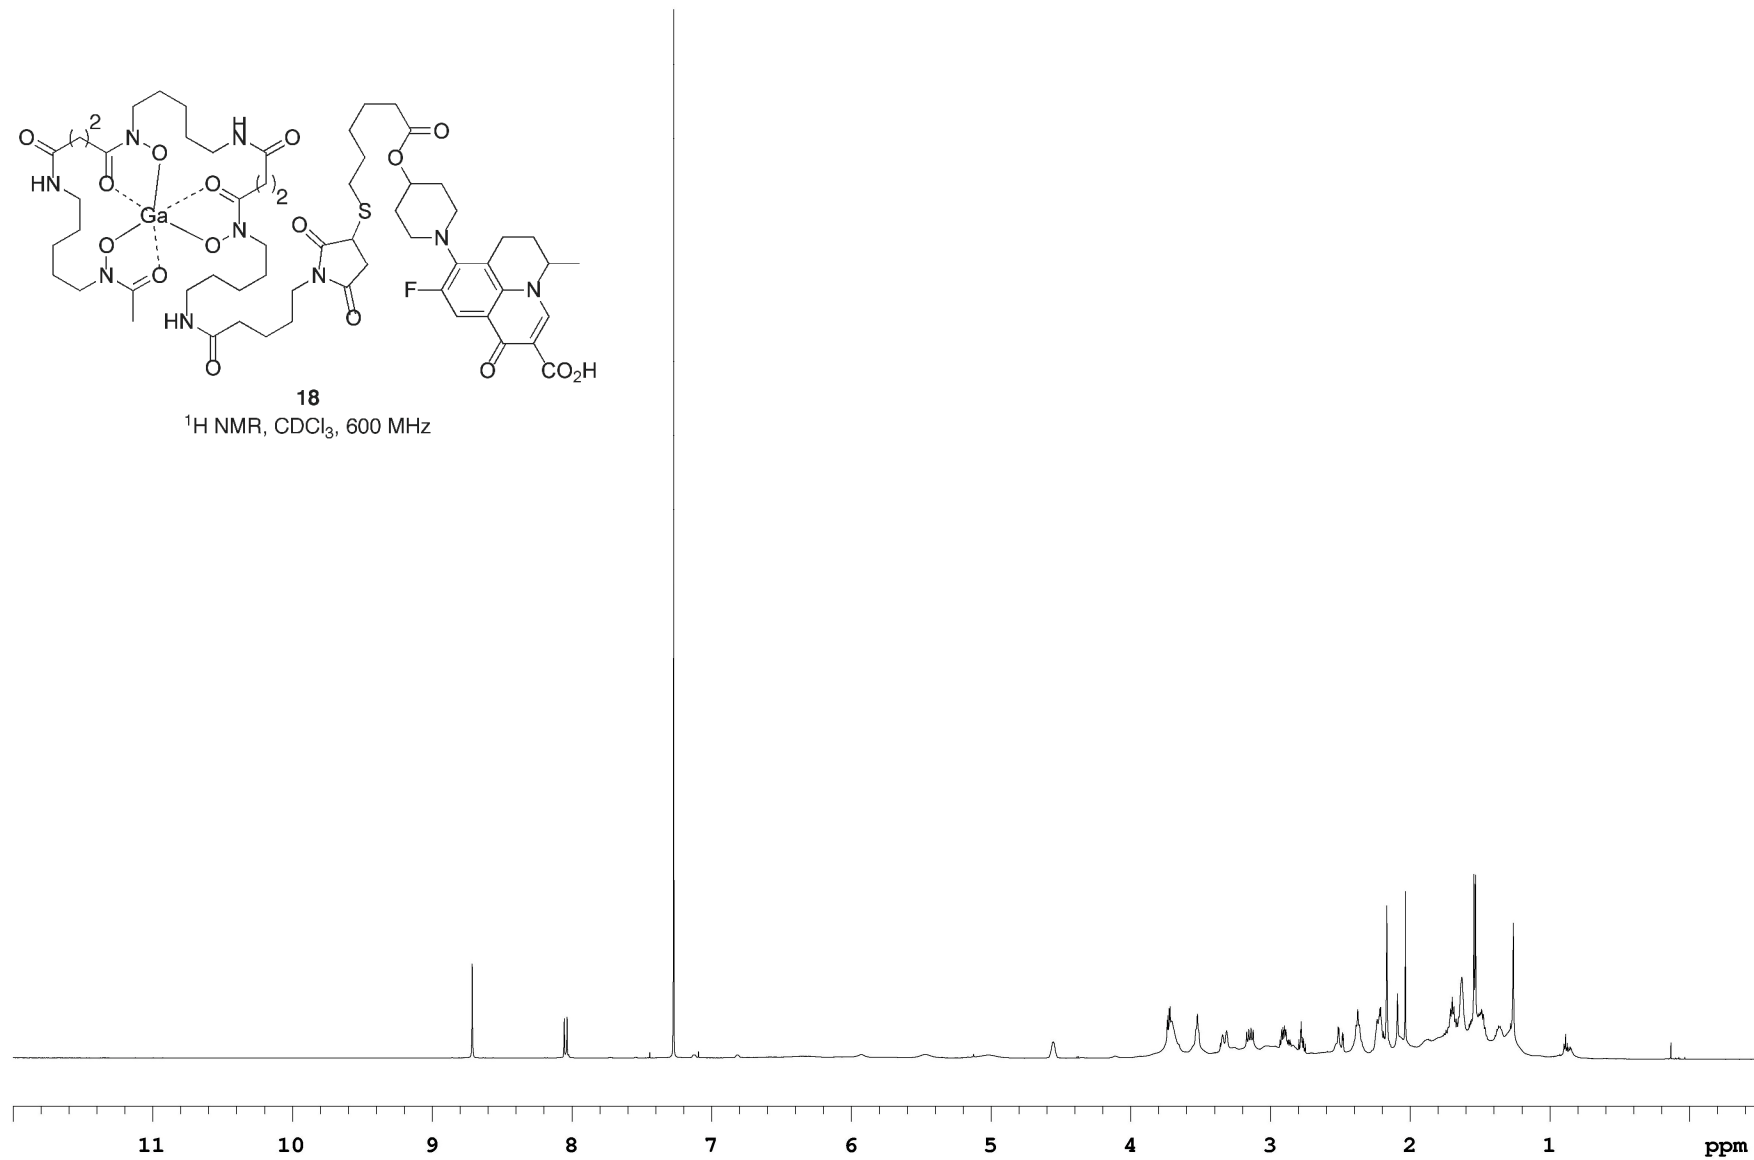

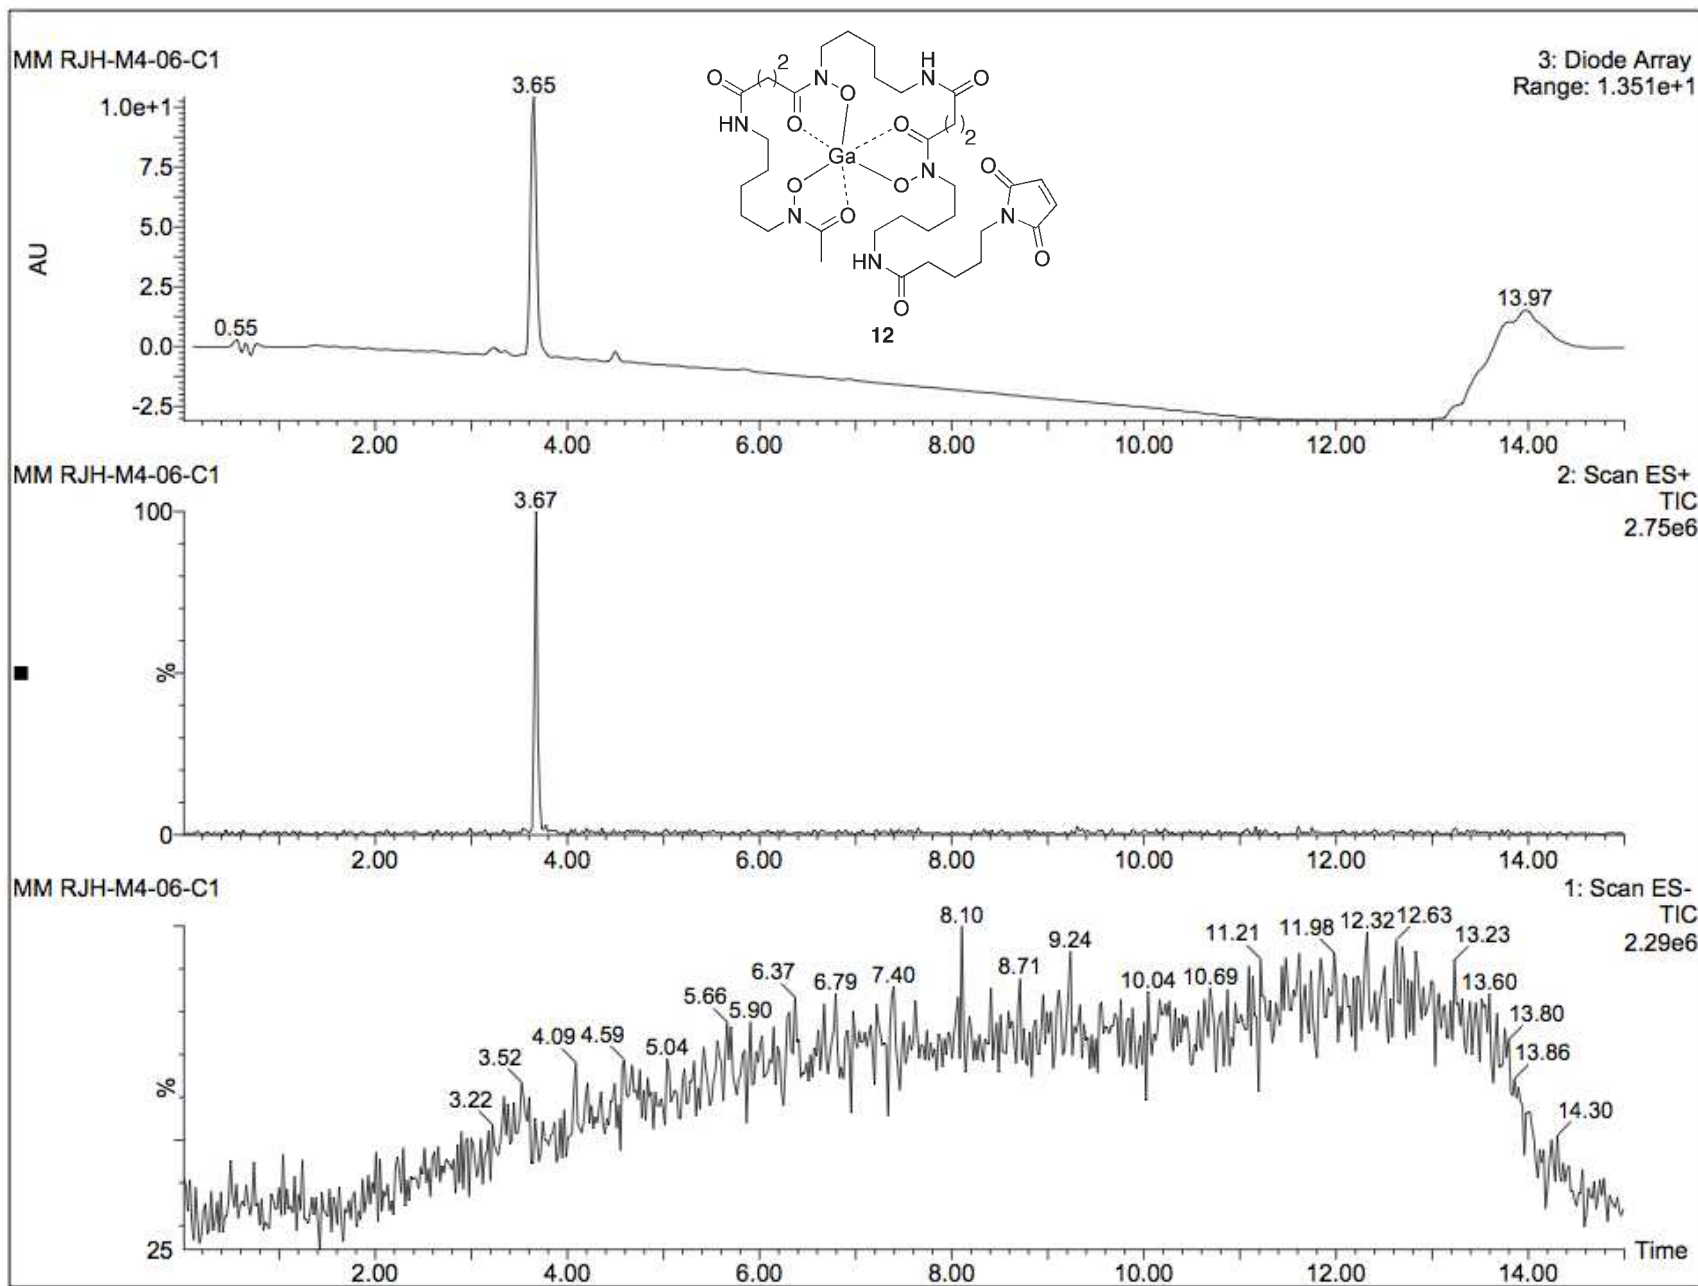



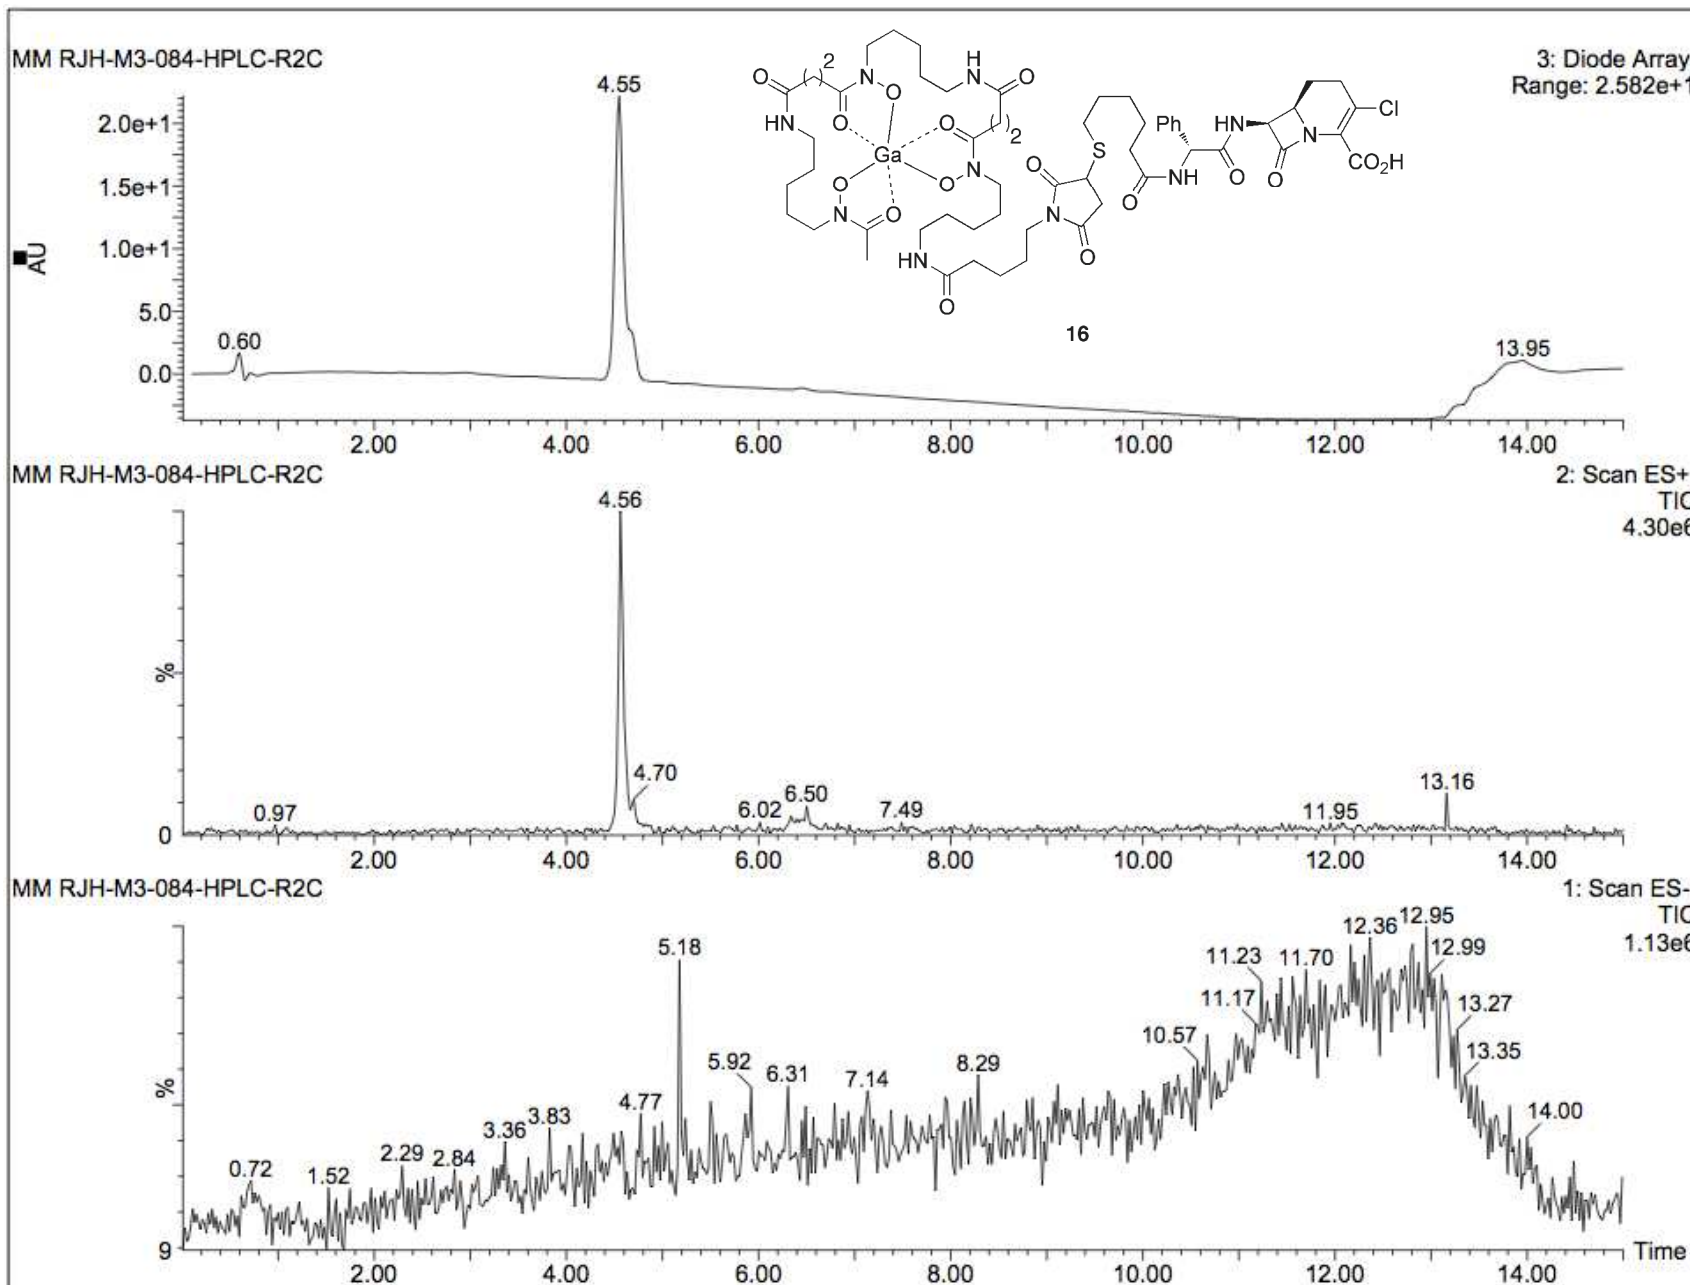

MM RJH-M3-084-HPLC-R2C 226 (4.562)

2: Scan ES+  
7.86e5

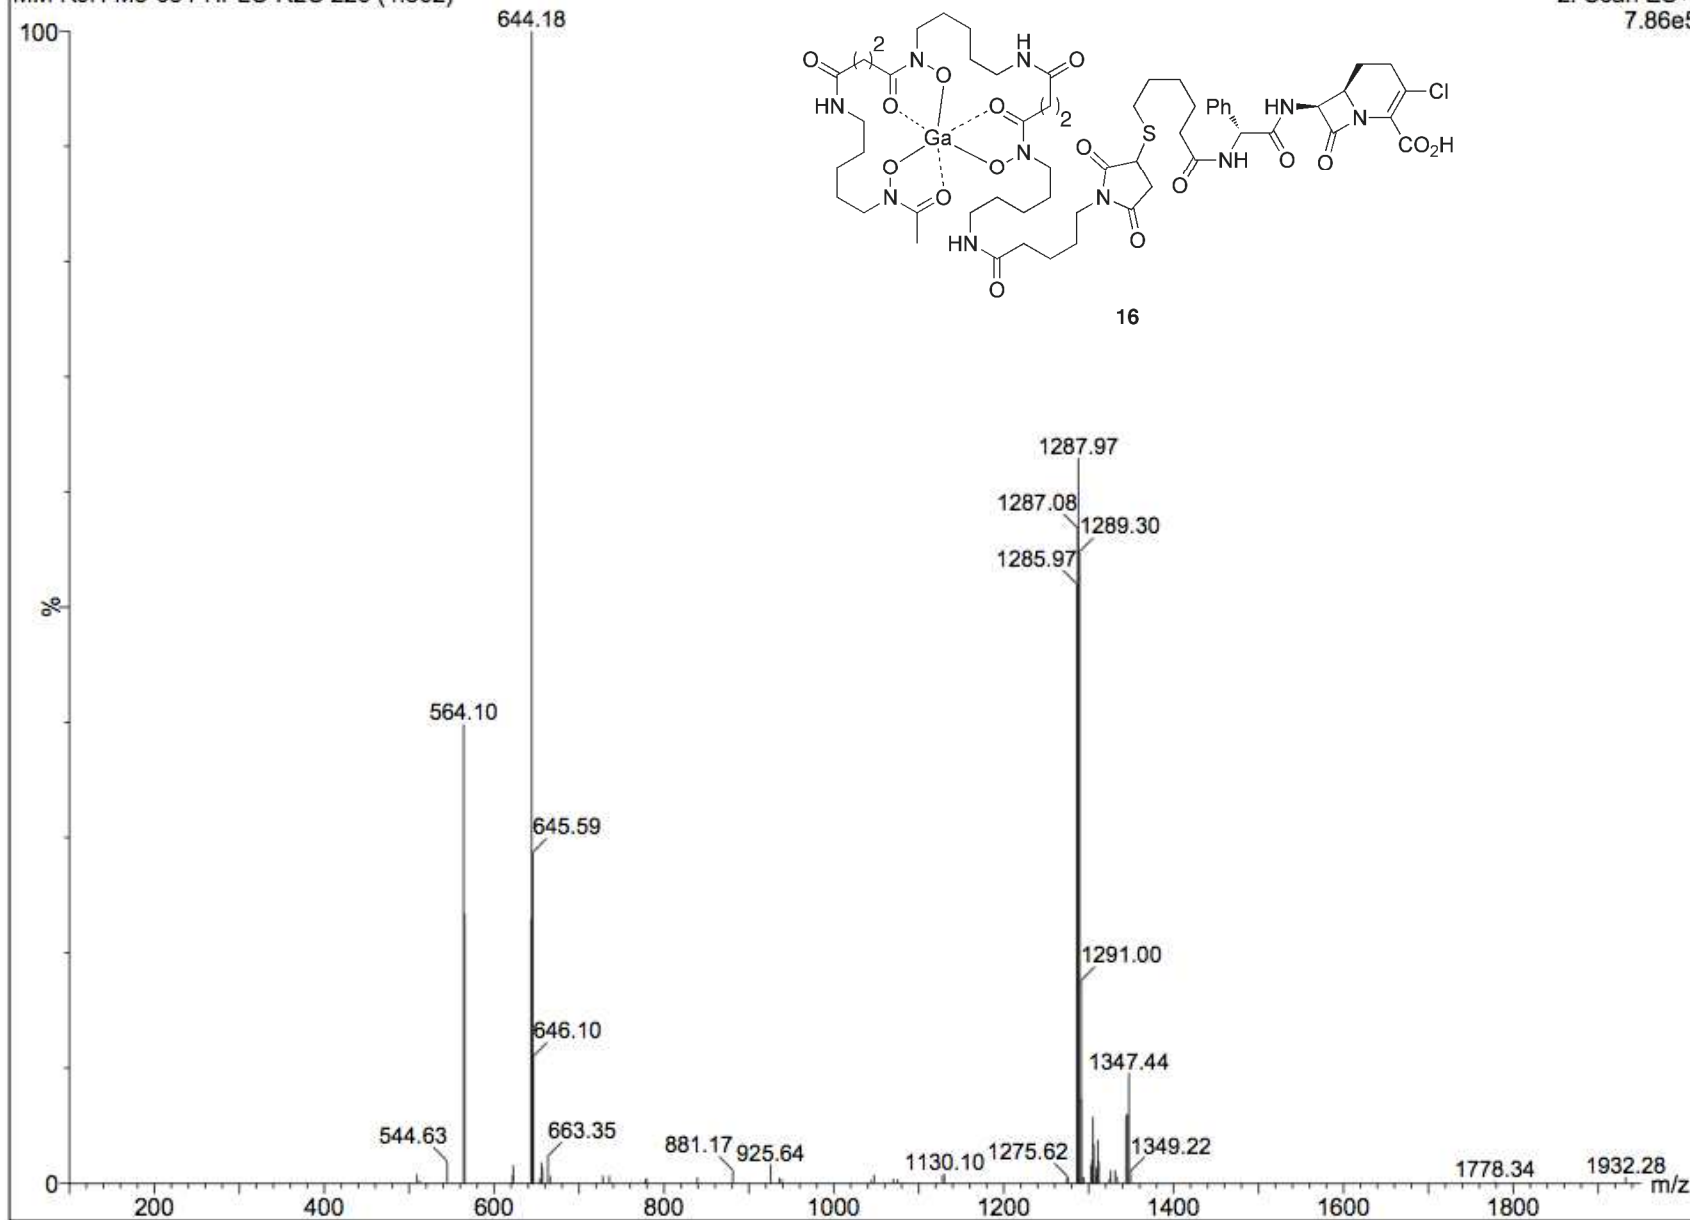

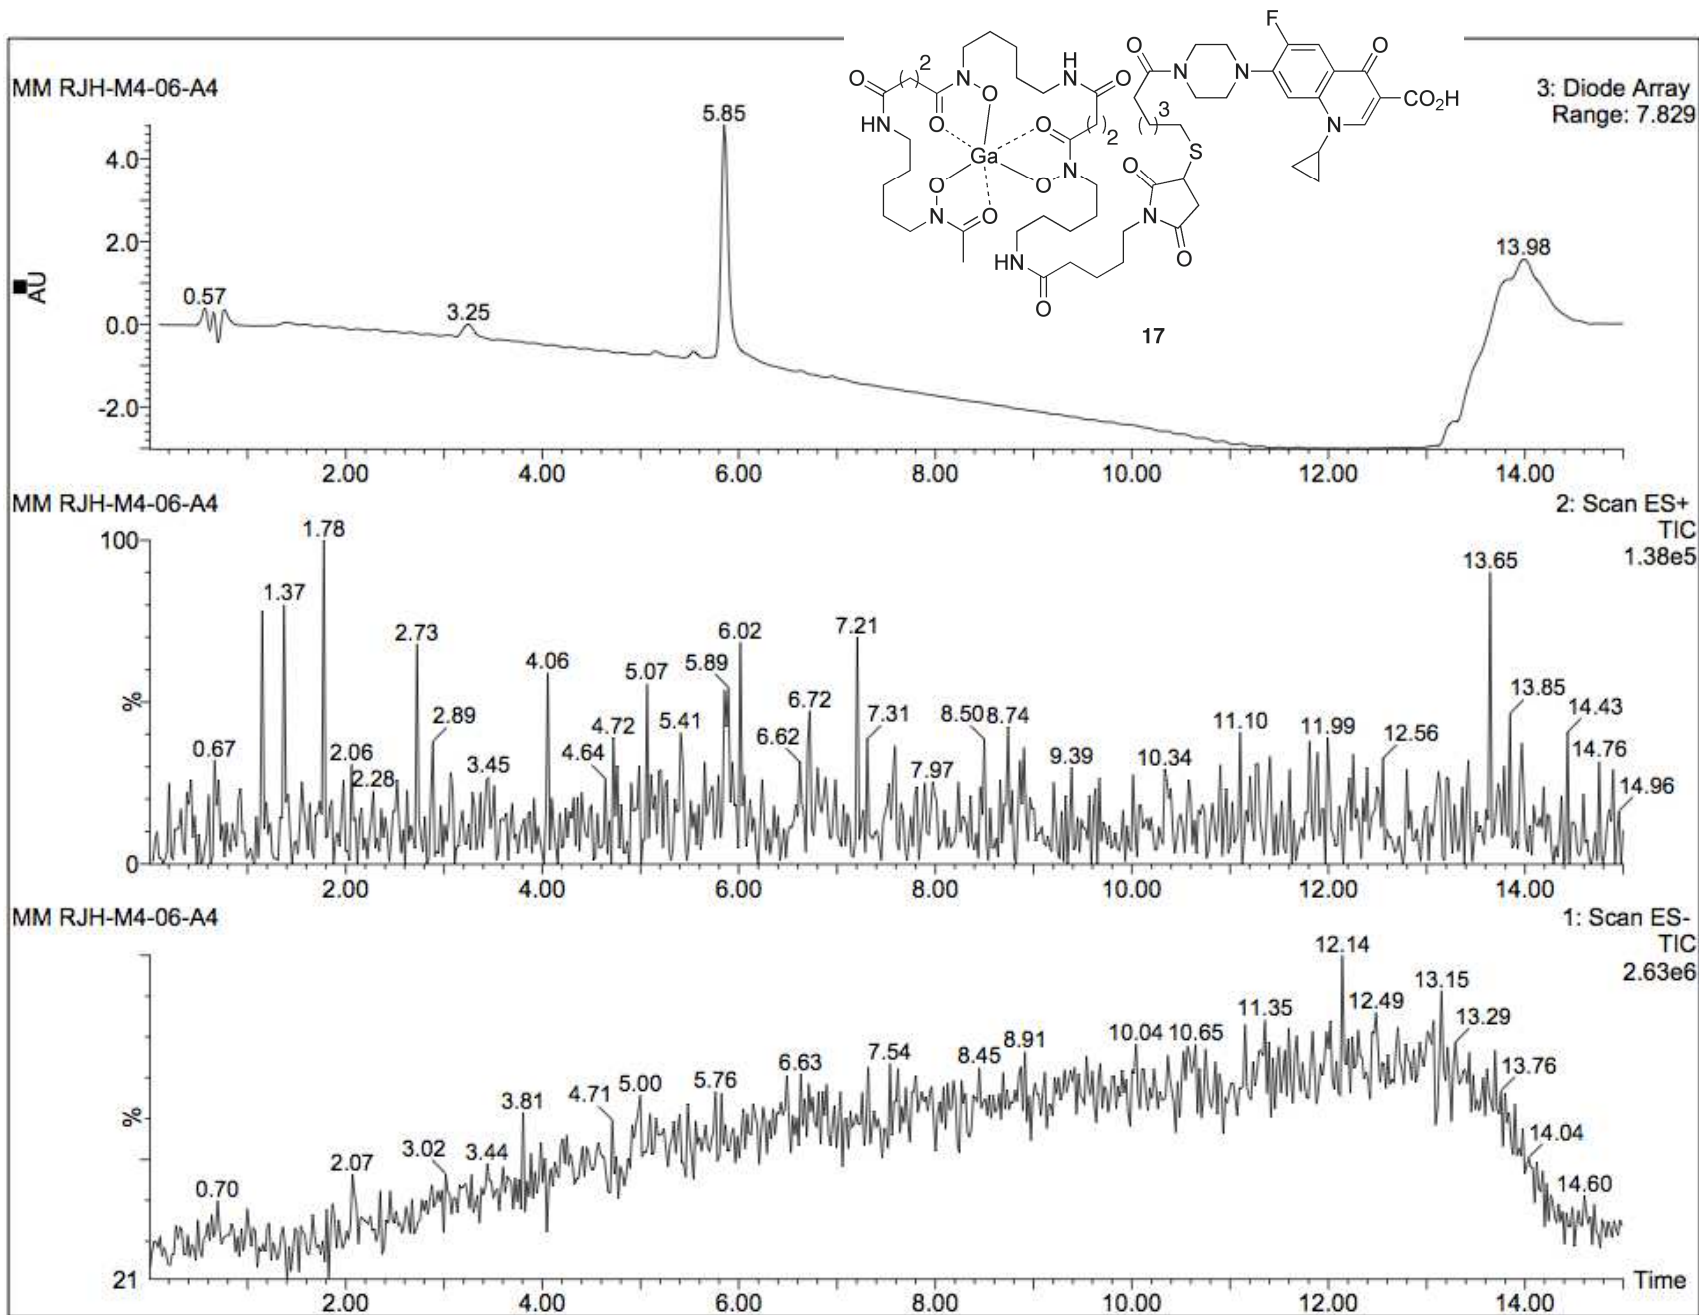



MM RJH-M4-06-A4 290 (5.854)

2: Scan ES+  
1.92e4

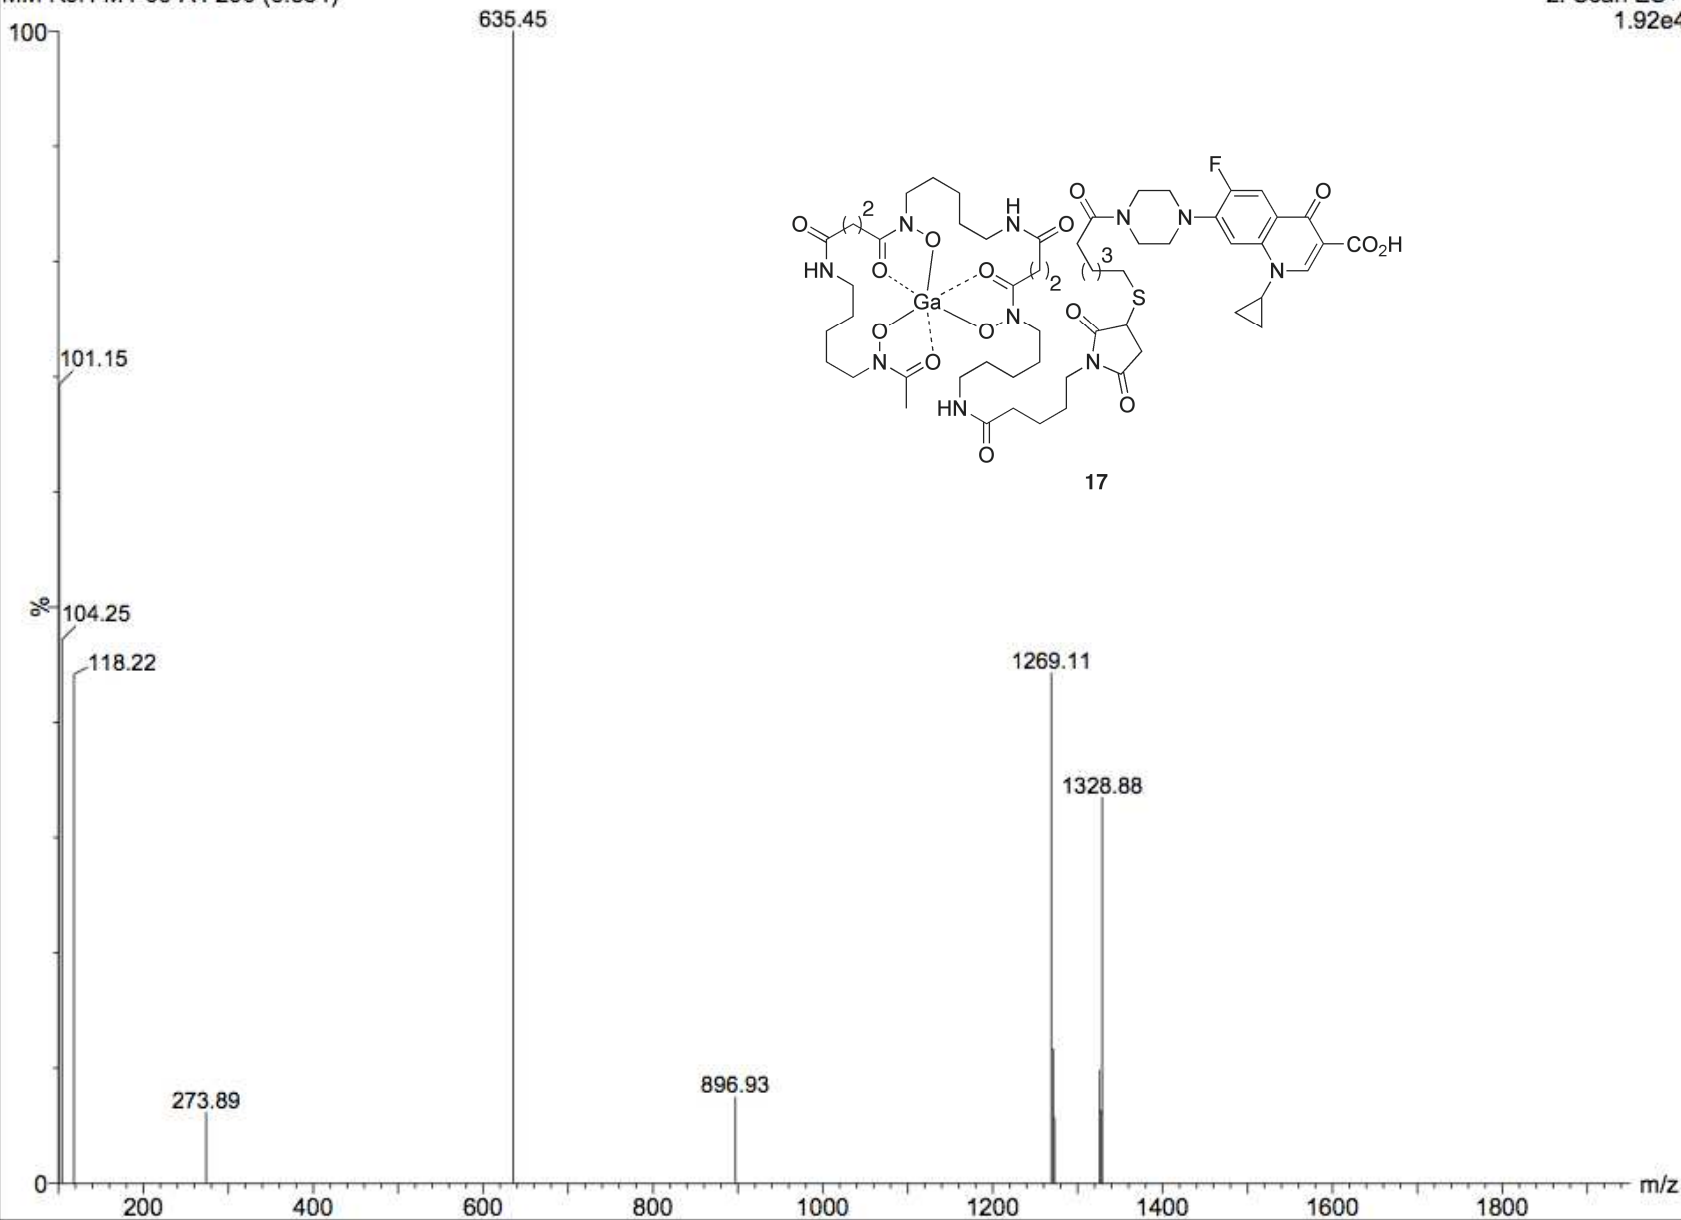



MM RJH-M4-010-1E 251 (5.070)

2: Scan ES+  
4.30e5

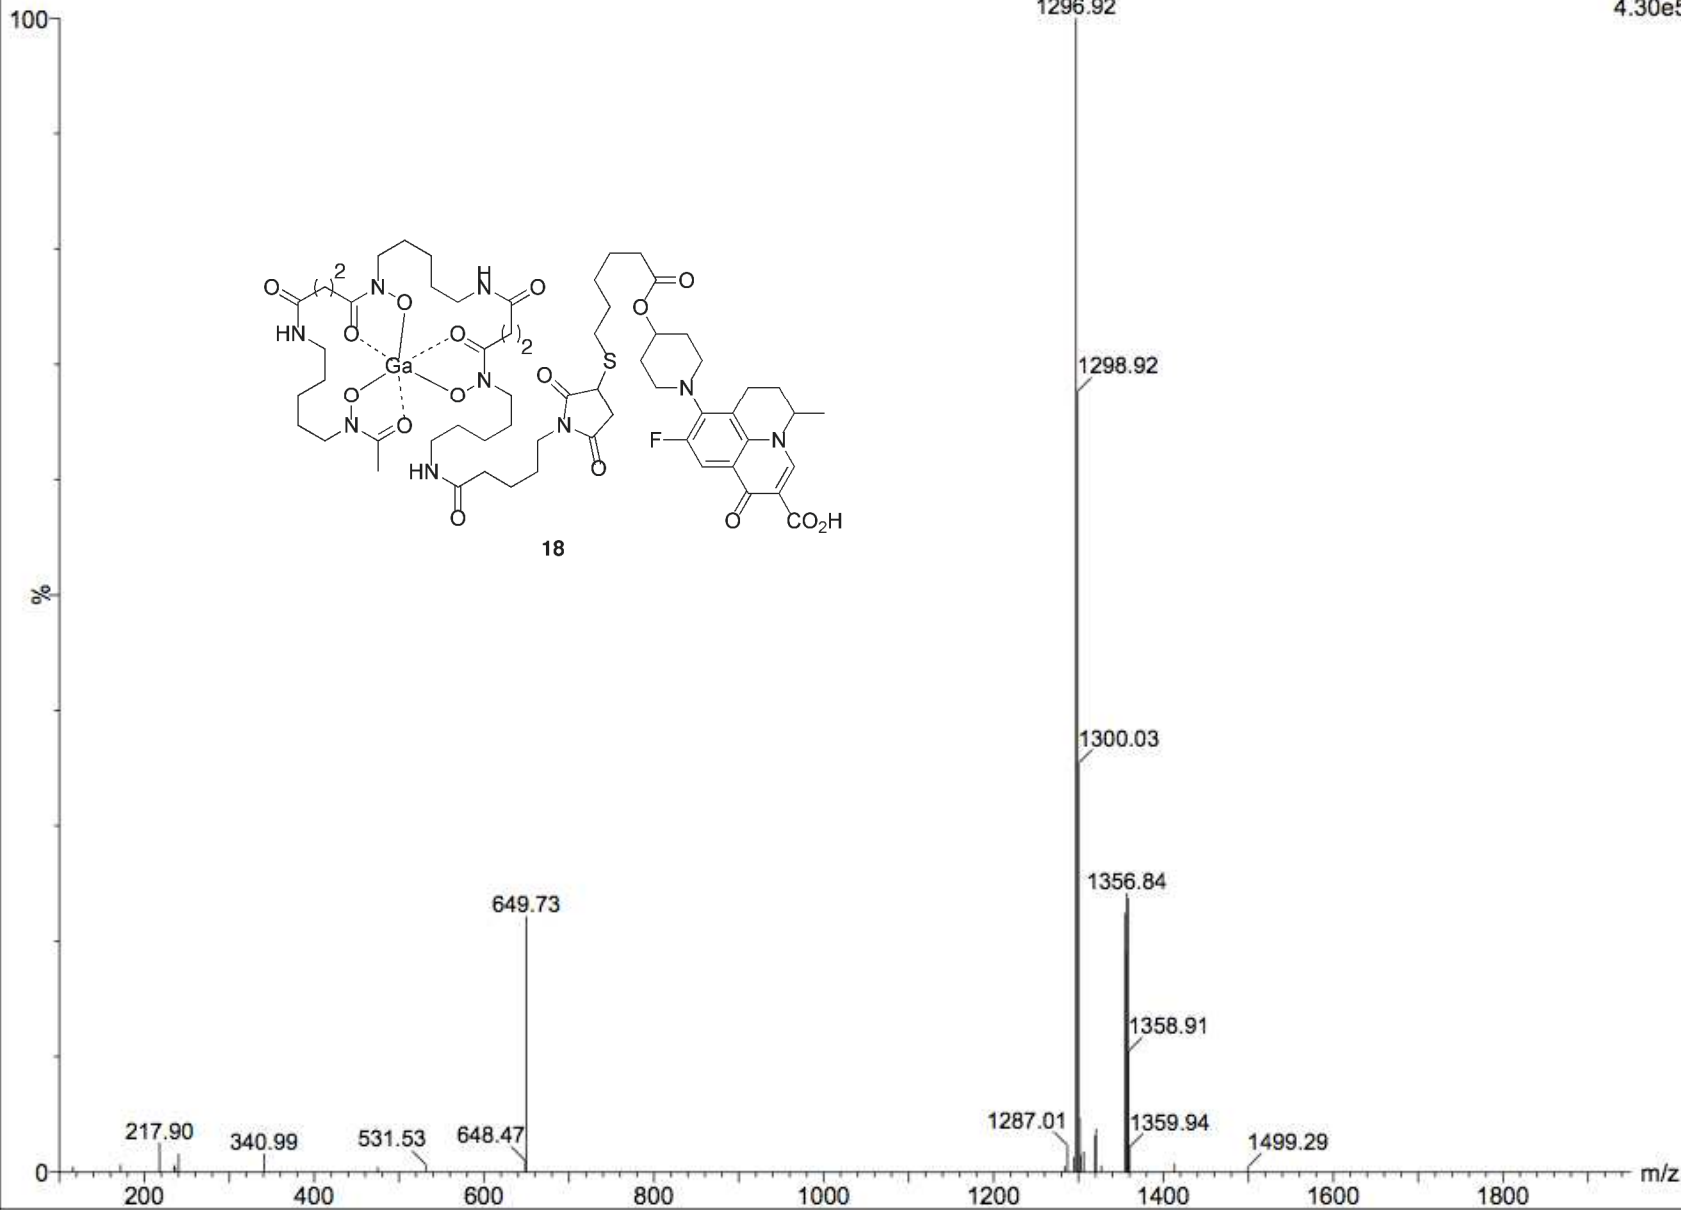

Supplement: ml300150y_si_001.pdf [file ml300150y_si_001.pdf]
